# Supplementary material for: Understanding the physiological functions of the host xenobiotic-sensing nuclear receptors PXR and CAR on the gut microbiome using genetically modified mice
Source: PubMed Central journal article supplement — Acta Pharm Sin B. 2021 Jul 29;12(2):801–20. doi: 10.1016/j.apsb.2021.07.022 (PMC8897037; doi:10.1016/j.apsb.2021.07.022), 2021-07-29
Supplement: mmc1.pdf [file mmc1.pdf]

**Supporting Information for**

**Original article**

**Understanding the physiological functions of the host xenobiotic-sensing nuclear receptors PXR and CAR on the gut microbiome using genetically modified mice**

**Mallory Little<sup>a</sup>, Moumita Dutta<sup>a</sup>, Hao Li<sup>b</sup>, Adam Matson<sup>c</sup>, Xiaojian Shi<sup>d</sup>, Gabby Mascarinas<sup>a</sup>, Bruk Molla<sup>a</sup>, Kris Weigel<sup>a</sup>, Haiwei Gu<sup>d,\*</sup>, Sridhar Mani<sup>b,\*</sup>, Julia Yue Cui<sup>a,\*</sup>**

*<sup>a</sup>Department of Environmental and Occupational Health Sciences, University of Washington, Seattle, WA 98105, USA*

*<sup>b</sup>Einstein College of Medicine, Bronx, NY 10461, USA*

*<sup>c</sup>University of Connecticut, Hartford, CT 06106, USA*

*<sup>d</sup>Arizona Metabolomics Laboratory, College of Health Solutions, Arizona State University, Phoenix, AZ 85004, USA*

Receive 2 March 2021; received in revised form 29 May 2021; accepted 9 July 2021

\*Corresponding authors. Tel.: +1 206 616 4331.

E-mail addresses: [juliacui@uw.edu](mailto:juliacui@uw.edu) (Julia Yue Cui), [haiweigu@asu.edu](mailto:haiweigu@asu.edu) (Haiwei Gu), [sridhar.mani@einstein.yu.edu](mailto:sridhar.mani@einstein.yu.edu) (Sridhar Mani).

## Section 1 Supporting tables.

**Table S1** Optimized UPLC–MS/MS gradient for bile acid chromatography.

| Time (min) | Mobile phase A (%)<br>(10 mmol/L ammonium acetate with 20% acetonitrile in water) | Mobile phase B (%)<br>(10 mmol/L ammonium acetate with 80% acetonitrile in water) |
|------------|-----------------------------------------------------------------------------------|-----------------------------------------------------------------------------------|
| 0.00       | 95                                                                                | 5                                                                                 |
| 5.00       | 95                                                                                | 5                                                                                 |
| 14.00      | 86                                                                                | 14                                                                                |
| 14.50      | 75                                                                                | 25                                                                                |
| 17.50      | 75                                                                                | 25                                                                                |
| 18.00      | 50                                                                                | 50                                                                                |
| 22.00      | 50                                                                                | 50                                                                                |
| 22.50      | 20                                                                                | 80                                                                                |
| 24.50      | 20                                                                                | 80                                                                                |
| 25.00      | 95                                                                                | 5                                                                                 |

**Table S2** Primer sequences.

| qPCR Target                        | Forward primer (5'–3') | Reverse primer (5'–3') |
|------------------------------------|------------------------|------------------------|
| Bile salt hydrolase ( <i>Bsh</i> ) | ATGGGCGGACTAGGATTACC   | TGCCACTCTCTGTCTGCATC   |
| <i>L. acidophilus</i>              | AGCGAGCTGAACCAACAGAT   | TGATCATGCGATCTGCTTTC   |
| <i>L. johnsonii</i>                | GAGCGAGCTTGCCTAGATGA   | ATCGCCTTGGTAAGCCATTA   |
| <i>Il-6</i>                        | CCGGAGAGGAGACTTCACAG   | TCCACGATTTCCAGAGAAC    |
| <i>Il-2</i>                        | GAGTCAGCAACTGTGGTGGGA  | AGGGCTTGTGAGATGATGC    |
| <i>Il-12p35</i>                    | CTCCTGTGGGAGAAGCAGAC   | CAGATAGCCCATCACCTGT    |

**Table S3** Bacteria commonly regulated across *PXR*-null vs. WT and *CAR*-null vs. WT comparisons.

| Adolescent males               | Adult males                                                        | Adolescent females             | Adult females              |
|--------------------------------|--------------------------------------------------------------------|--------------------------------|----------------------------|
| <i>Anaerostipes</i> sp.        | <i>Anaerostipes</i> sp.                                            | <i>Anaerostipes</i> sp.        | <i>Anaerostipes</i> sp.    |
| <i>Akkermansia muciniphila</i> | <i>Dehalobacterium</i> sp.                                         | <i>Akkermansia muciniphila</i> | Mogibacteriaceae family    |
| <i>Mucispirillum shaedleri</i> | <i>Bacteroides acidifaciens</i>                                    | <i>Bacteroides</i> sp.         | <i>Bacteroides</i> sp.     |
| <i>Helicobacter</i> sp.        | <i>Helicobacter</i> sp.                                            | <i>Anaeroplasma</i> sp.        | <i>Helicobacter</i> sp.    |
| Helicobacteraceae family       | Helicobacteraceae family                                           | <i>Enterococcus</i> sp.        | Helicobacteraceae family   |
| <i>Oscillospira</i> sp.        | <i>Sutterella</i> sp.                                              | <i>Lactococcus</i> sp.         | <i>Lactococcus</i> sp.     |
| <i>Clostridiales</i> order     | <i>Parabacteroides</i> sp.<br>S24-7 family (now<br>Muribaculaceae) | <i>Carnobacterium</i> sp.      | <i>Parabacteroides</i> sp. |

## Section 2 Supporting figures

Figure S1

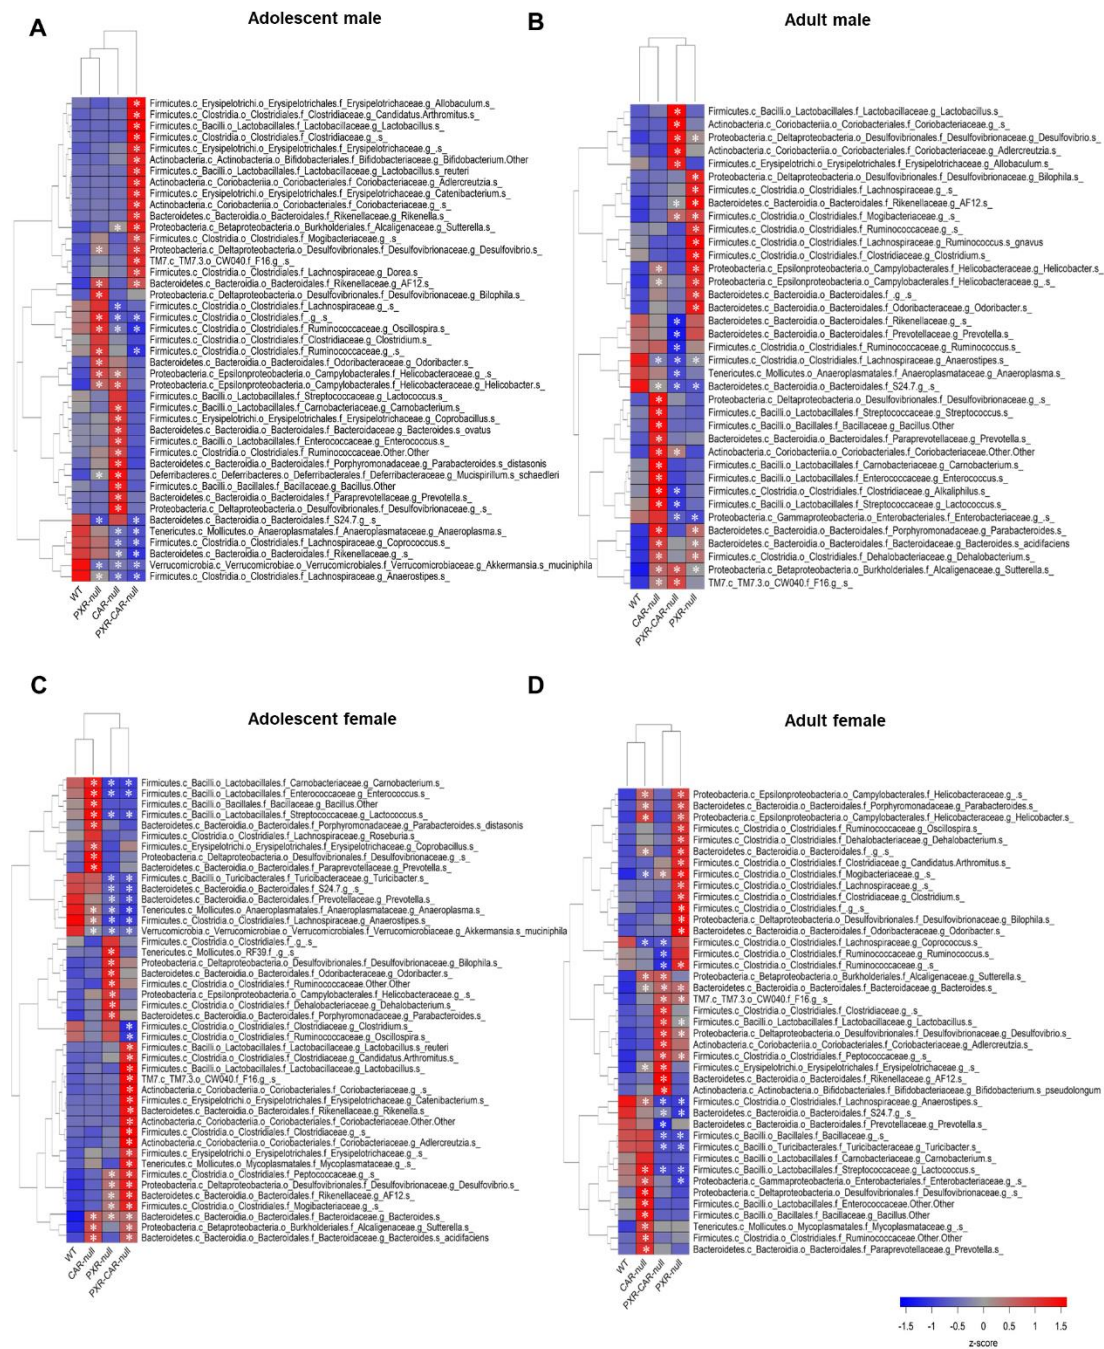

**Figure S1 Differentially abundant taxa in C57BL/6 WT, PXR-null, CAR-null, and PXR-CAR-null mice.** Two-way hierarchical clustering of the mean differentially abundant taxa in fecal samples from adolescent- and adult-aged male and female C57BL/6 WT, PXR-null, CAR-null, and PXR-CAR-null mice, as generated by the R packages gplots and RColorBrewer.

Asterisks (\*) represent statistically significant differences compared to WT mice (one-way ANOVA, Duncan's post hoc,  $P < 0.05$ ).

**Figure S2**

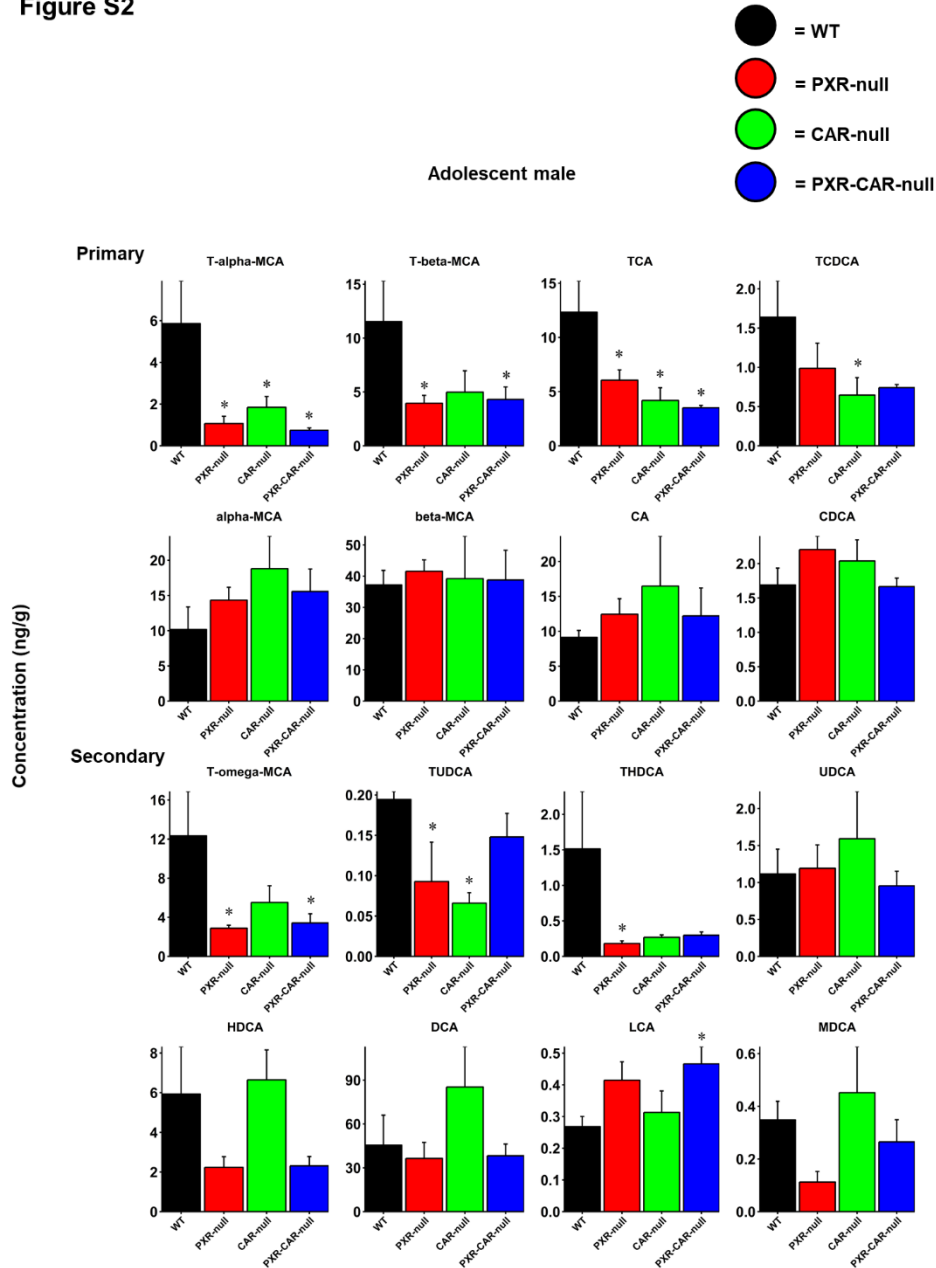

**Figure S2 BA concentrations in C57BL/6 WT, PXR-null, CAR-null, and PXR-CAR-null adolescent male mice.** Individual bar plots of mean (SE) BA concentrations (ng/g) in adolescent male mice as generated by the R package ggplot2. BAs were quantified by LC MS/MS as described in Materials and methods. Asterisks (\*) represent statistically significant differences compared to WT mice (one-way ANOVA, Duncan's post hoc,  $P < 0.05$ ).

Figure S3

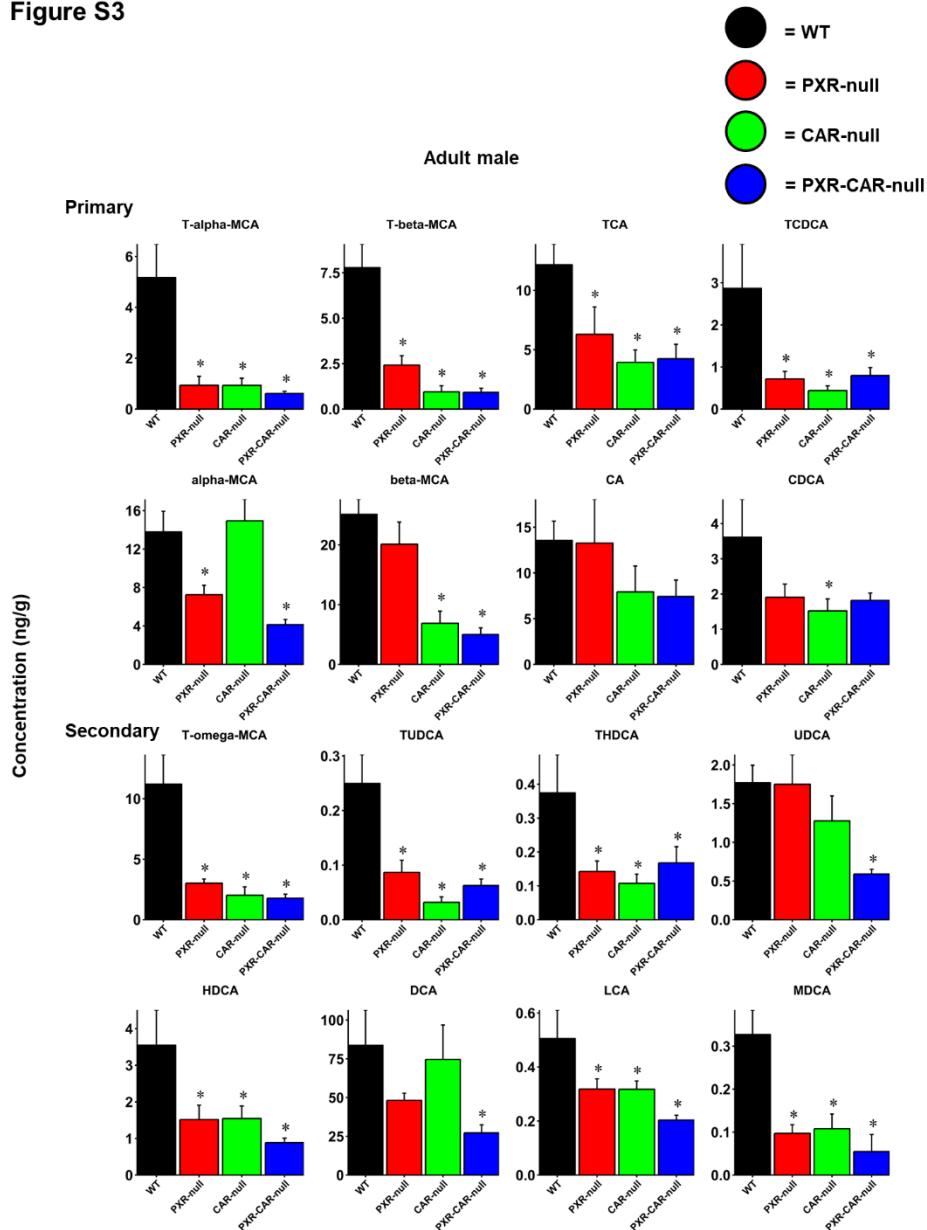

Figure S3 BA concentrations in C57BL/6 WT, *PXR-null*, *CAR-null*, and *PXR-CAR-null* adult male mice. Individual bar plots of mean (SE) BA concentrations (ng/g) in adult male, mice as generated by the R package ggplot2. BAs were quantified by LC-MS/MS as described in Materials and methods. Asterisks (\*) represent statistically significant differences compared to WT mice (one-way ANOVA, Duncan's post hoc,  $P < 0.05$ ).

Figure S4

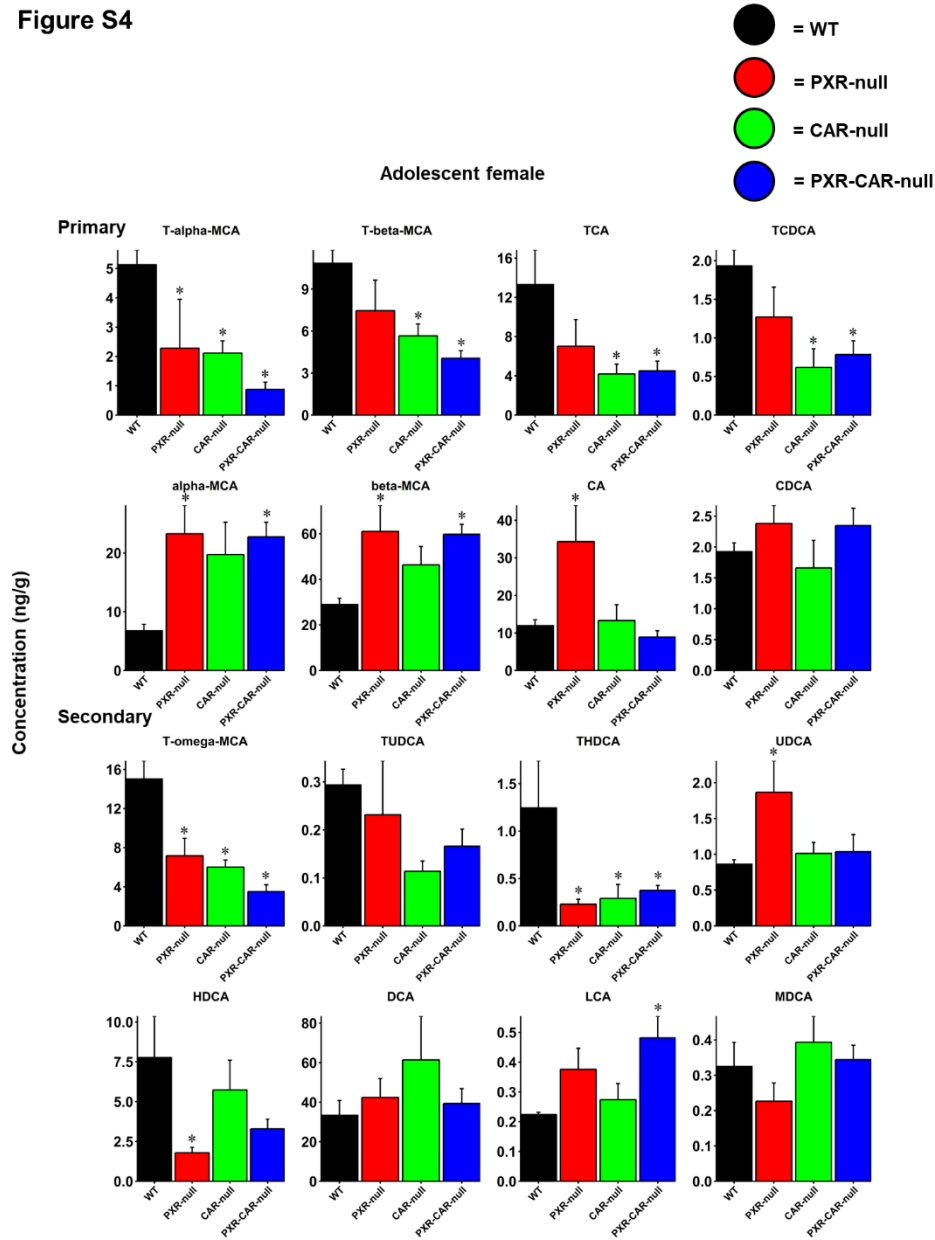

Figure S4 BA concentrations in C57BL/6 WT, *PXR*-null, *CAR*-null, and *PXR-CAR*-null adolescent female mice. Individual bar plots of mean (SE) BA concentrations (ng/g) in adolescent female mice as generated by the R package ggplot2. BAs were quantified by LC MS/MS as described in Materials and methods. Asterisks (\*) represent statistically significant differences compared to WT mice (one-way ANOVA, Duncan's post hoc,  $P < 0.05$ ).

Figure S5

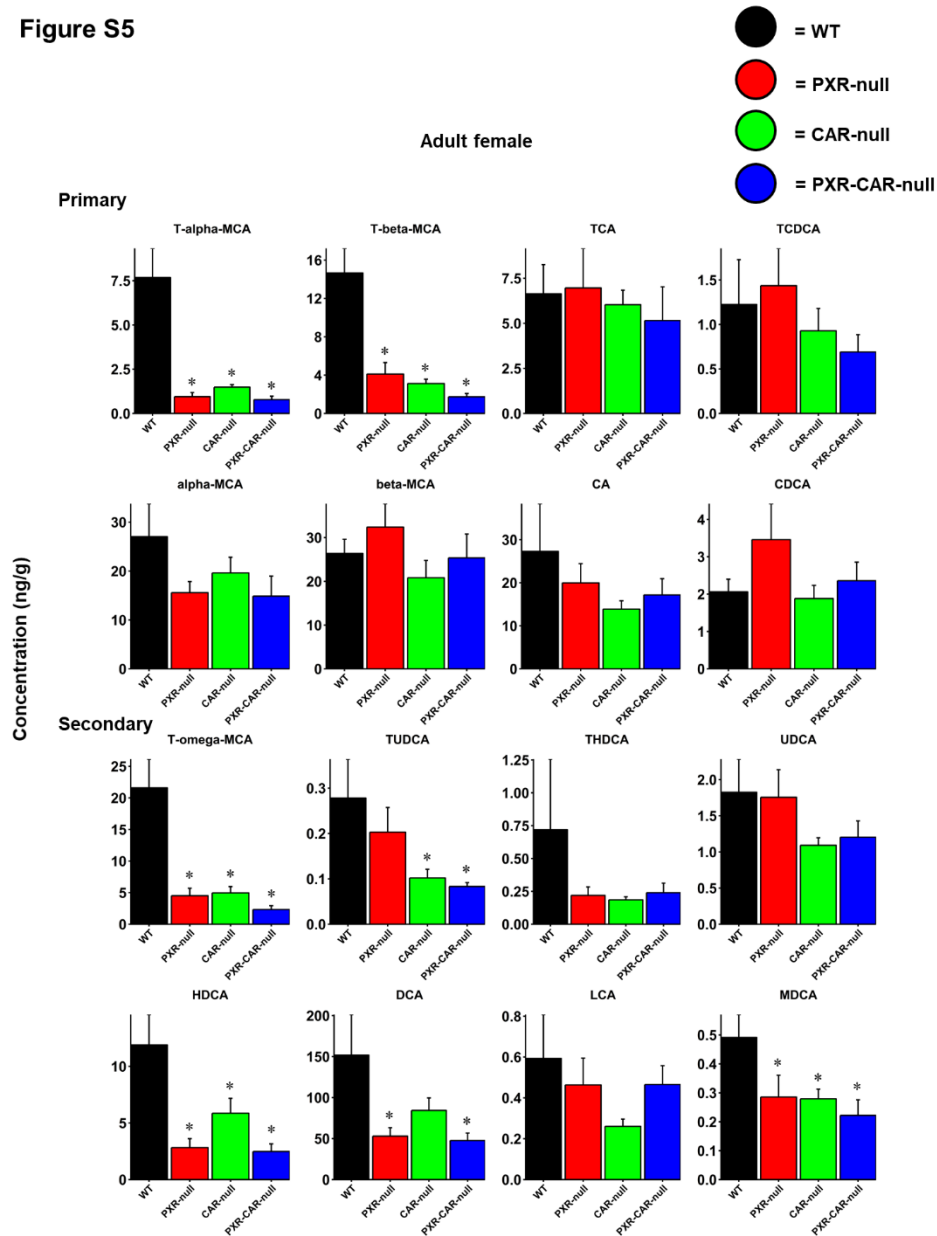

**Figure S5 BA concentrations in C57BL/6 WT, PXR-null, CAR-null, and PXR-CAR-null adult female mice.** Individual bar plots of mean (SE) BA concentrations (ng/g) in adult female, mice as generated by the R package ggplot2. BAs were quantified by LC–MS/MS as described in Materials and methods. Asterisks (\*) represent statistically significant differences compared to WT mice (one-way ANOVA, Duncan’s post hoc,  $P < 0.05$ ).

Figure S6

A

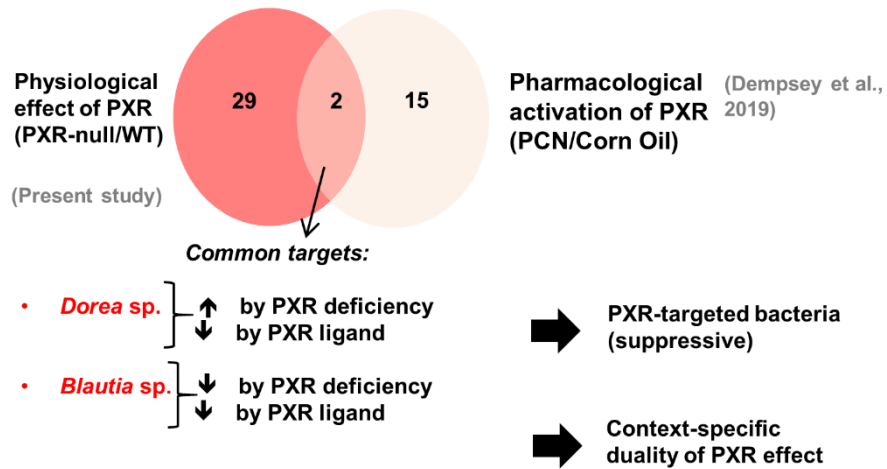

B

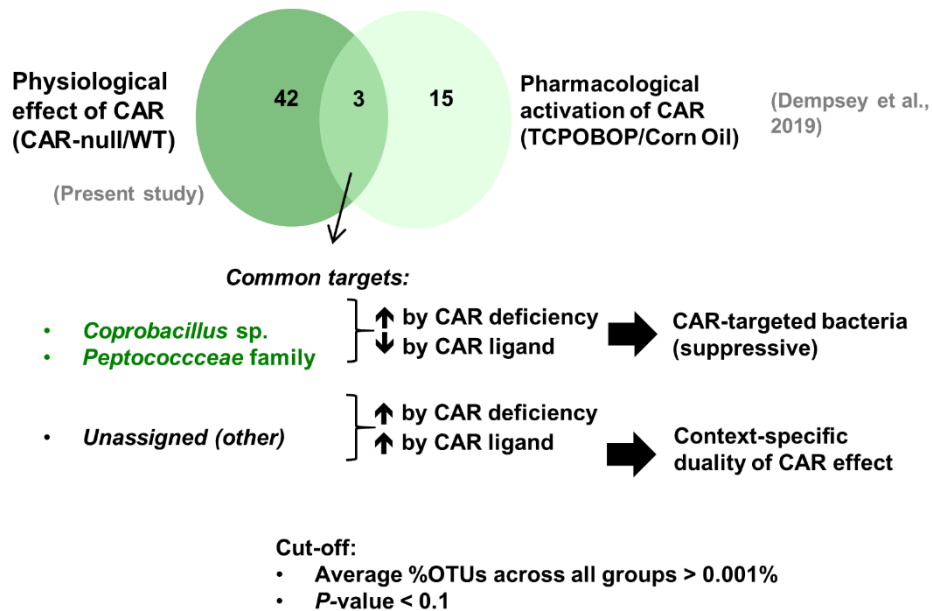

**Figure S6 A. Comparison between physiological activation of PXR and pharmacological activation of PXR by its prototypical ligand PCN.** Differentially regulated bacteria between *PXR*-null and WT mice of the present study (adult males only) were cross-referenced with a previous 16S rDNA sequencing study where adult C57BL/6 male mice were orally gavaged with the prototypical PXR ligand PCN (75 mg/kg) once daily for 4 consecutive days (PCN vs. vehicle [corn oil])<sup>30</sup>. Commonly and uniquely regulated bacteria between the two models are shown in a venn diagram. **B. Comparison between physiological activation of CAR and pharmacological activation of CAR by its prototypical ligand TCPOBOP.** Differentially



regulated bacteria between *CAR*-null and WT mice of the present study (adult males only) were cross-referenced with a previous 16S rDNA sequencing study where adult C57BL/6J male mice were orally gavaged with the prototypical *CAR* ligand TCPOBOP (3 mg/kg) once daily for 4 consecutive days (TCPOBOP vs. vehicle [corn oil])<sup>30</sup>. Commonly and uniquely regulated bacteria between the two models are shown in a venn diagram. The filtering criteria for both A and B are: average % OTUs across all groups > 0.001% in each study, and  $P < 0.1$ .

Figure S7

Note: BDE-47 and BDE-99: known activators of PXR and CAR  
(Pacyniak et al., 2007; Sueyoshi et al., 2013; Li et al., 2017)

A

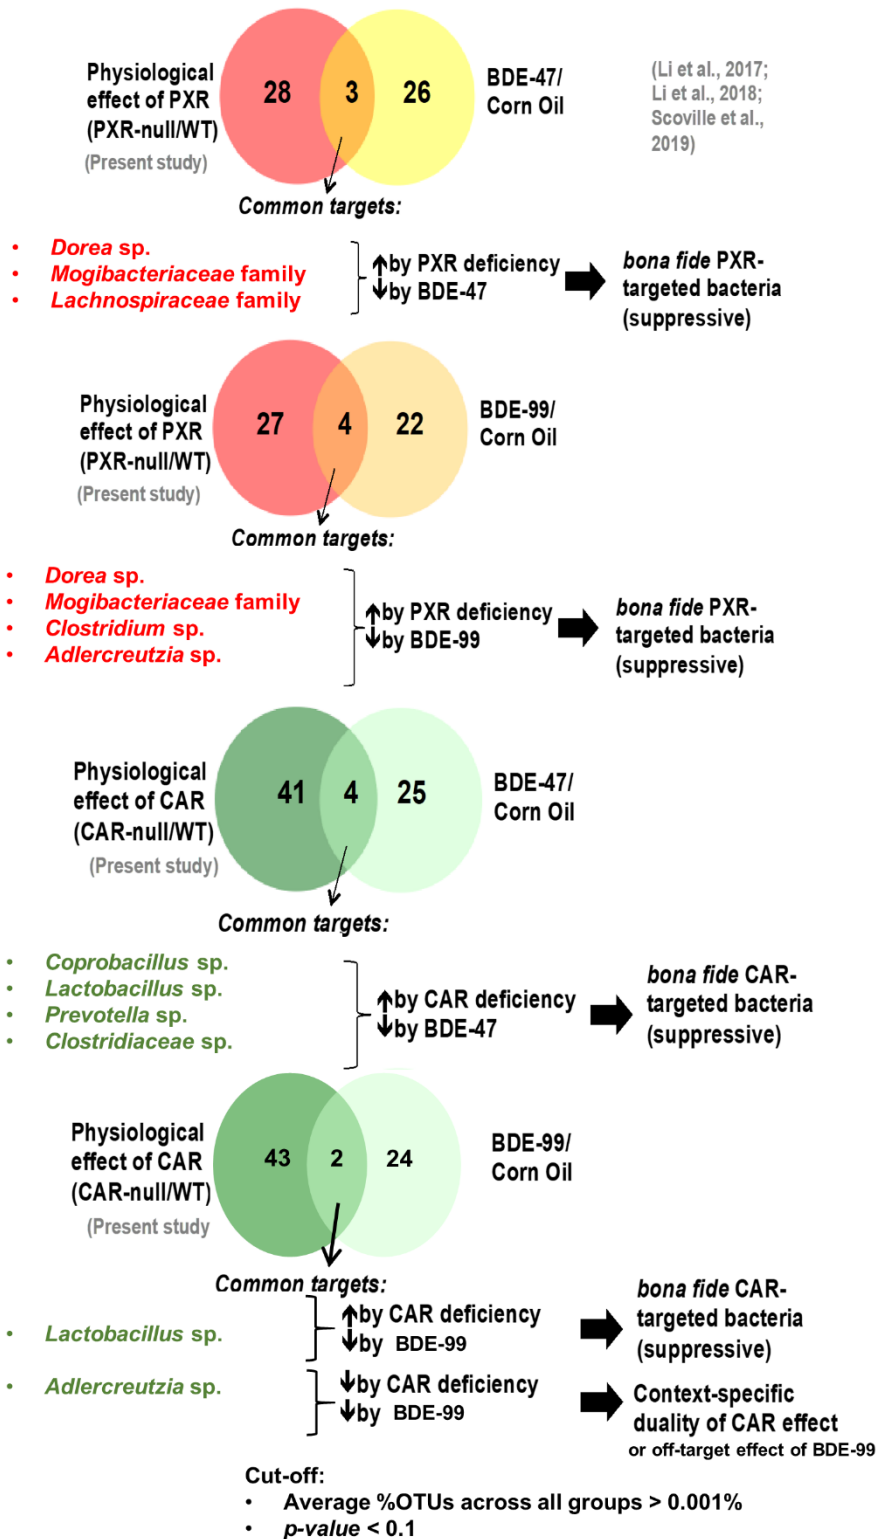

Figure S7 A. Comparison between physiological activation of PXR and toxicological activation of PXR by BDE-47 and BDE-99. Differentially regulated bacteria between *PXR*-null and WT mice of the present study (adult males only) were cross-referenced with a previous

16S rDNA sequencing study where adult C57BL/6 male mice were orally gavaged with BDE-47 or BDE-99 (known activators of PXR, 100  $\mu\text{mol/kg}$ ) once daily for 4 consecutive days (PBDEs vs. vehicle [corn oil])<sup>9,13,37</sup>. Commonly and uniquely regulated bacteria between the two models are shown in a venn diagram. **B. Comparison between physiological activation of CAR and toxicological activation of CAR by BDE-47 and BDE-99.** Differentially regulated bacteria between *PXR*-null and WT mice of the present study (adult males only) were cross-referenced with a previous 16S rDNA sequencing study where adult C57BL/6 male mice were orally gavaged with BDE-47 or BDE-99 (known activators of CAR, 100  $\mu\text{mol/kg}$ ) once daily for 4 consecutive days (PBDEs vs. vehicle [corn oil])<sup>9,13,37</sup>. Commonly and uniquely regulated bacteria between the two models are shown in a venn diagram. The filtering criteria for both A and B are: average % OTUs across all groups > 0.001% in each study, and  $P < 0.1$ .

Figure S8

Note: The PCB Fox River Mixture is known to activate PXR and CAR target genes (Lim et al., 2020)

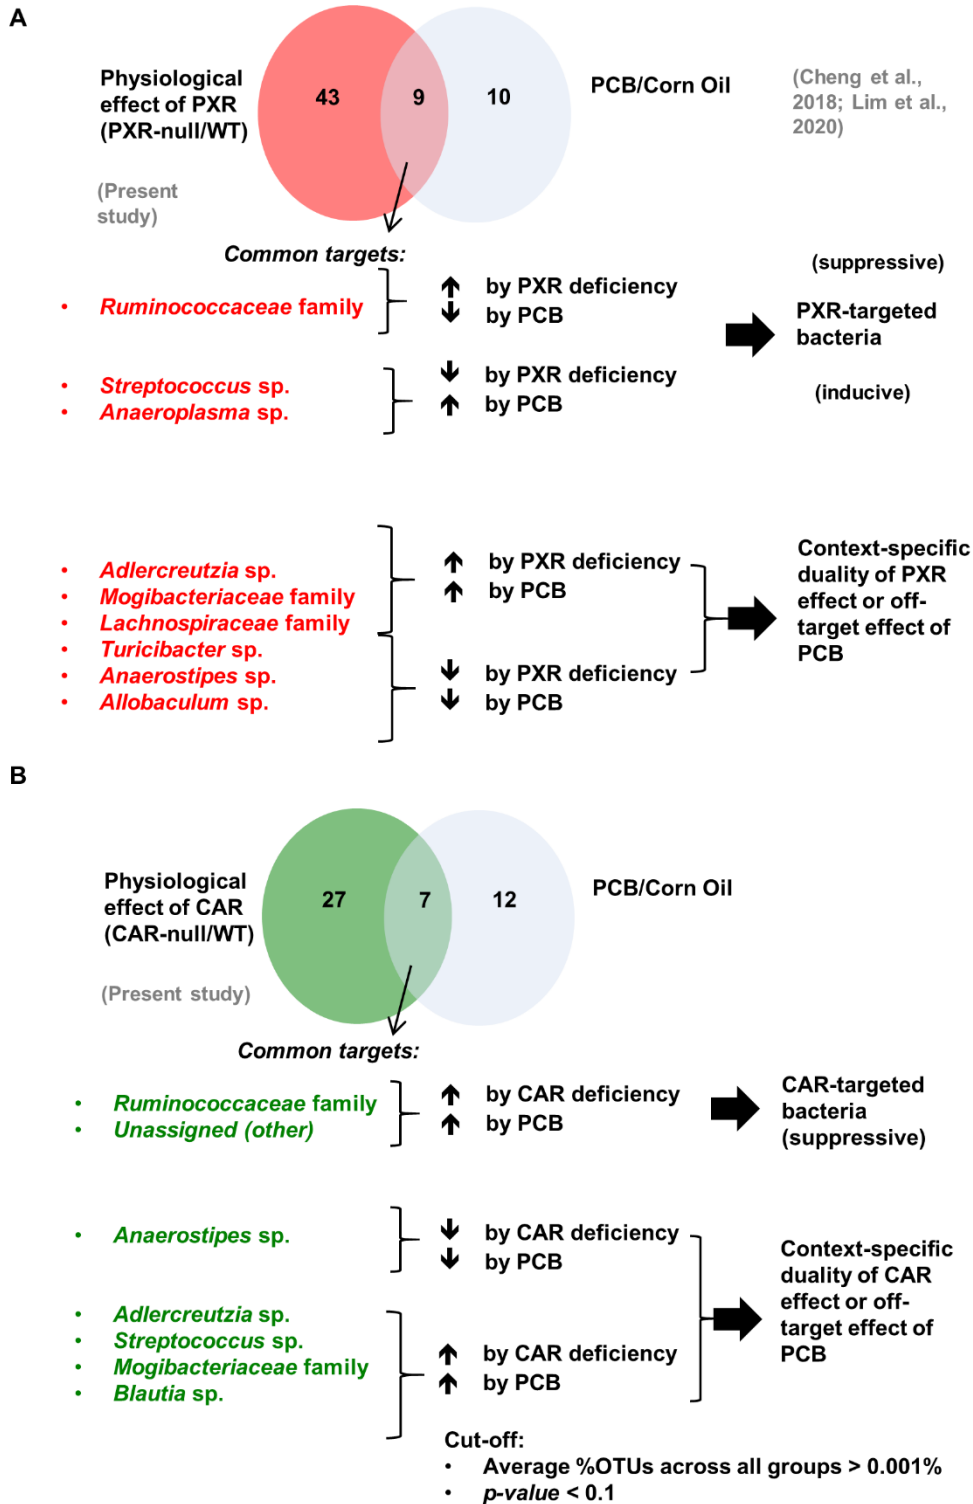

Figure S8 A. Comparison between physiological activation of PXR and toxicological activation of PXR by PCBs. Differentially regulated bacteria between *PXR*-null and WT mice of the present study (adult females only) were cross-referenced with a previous 16S rDNA

sequencing study where adult C57BL/6 female mice were orally gavaged with the Fox River PCB mixture (known activators of PXR, 6 mg/kg) once daily for 3 consecutive days (PCBs vs. vehicle [corn oil])<sup>31,40</sup>. Commonly and uniquely regulated bacteria between the two models are shown in a venn diagram. **B. Comparison between physiological activation of CAR and toxicological activation of CAR by PCBs.** Differentially regulated bacteria between *CAR*-null and WT mice of the present study (adult females only) were cross-referenced with a previous 16S rDNA sequencing study where adult C57BL/6 female mice were orally gavaged with the Fox River PCB mixture (known activators of PXR, 6 mg/kg) once daily for 3 consecutive days (PCBs vs. vehicle [corn oil])<sup>31,40</sup>. Commonly and uniquely regulated bacteria between the two models are shown in a venn diagram. The filtering criteria for both A and B are: average % OTUs across all groups > 0.001% in each study, and  $P < 0.1$ .

**Figure S9**

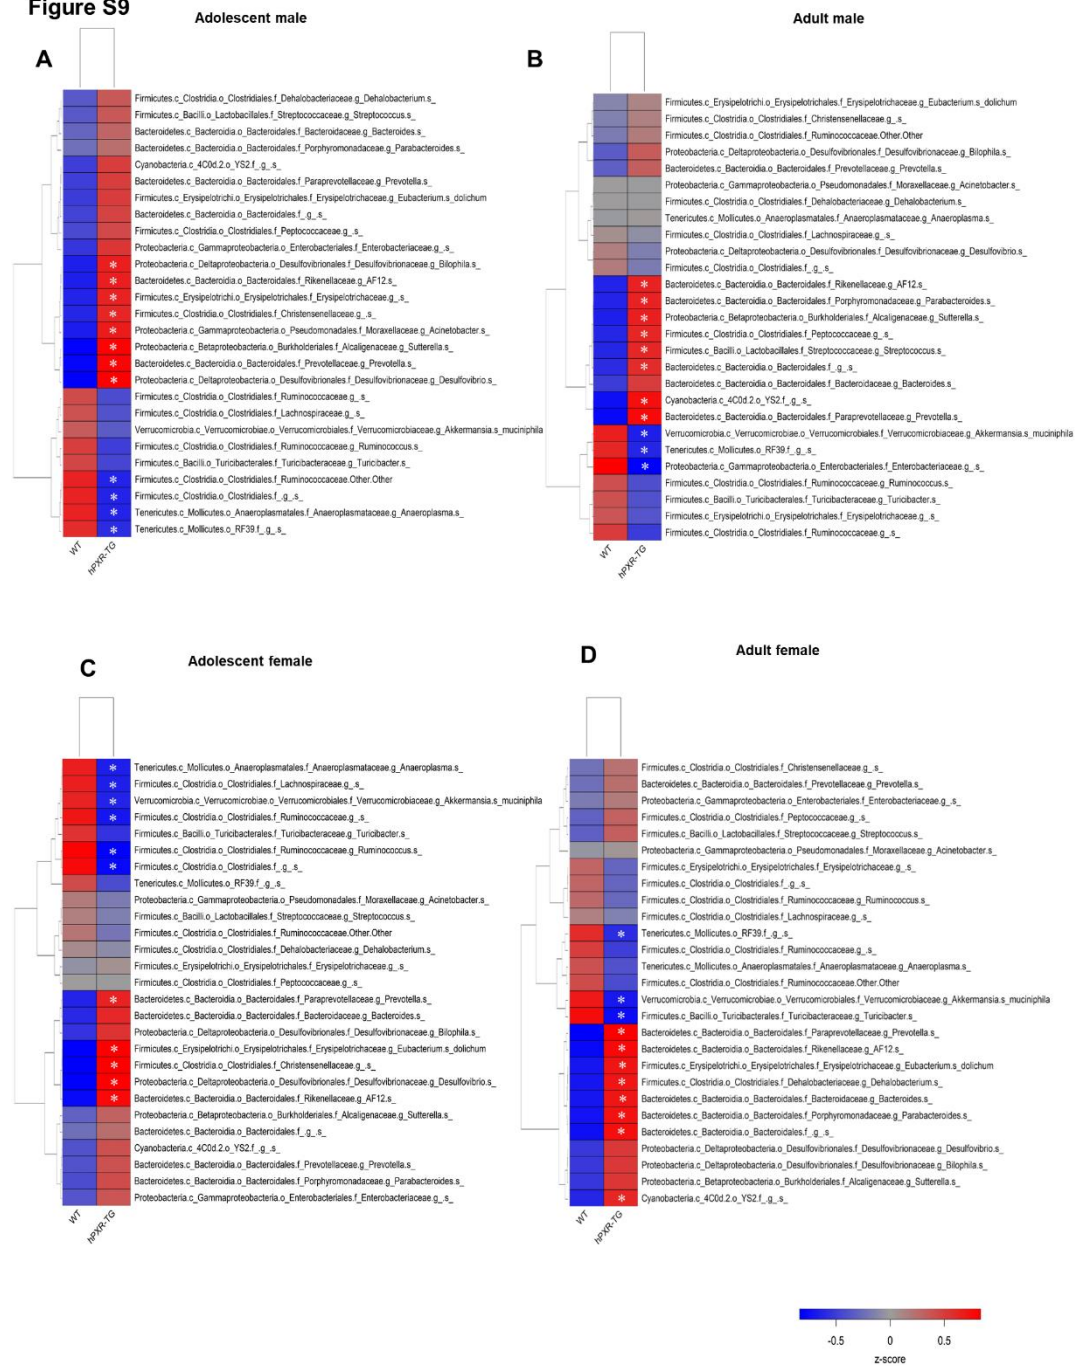

**Figure S9 Differentially abundant taxa in WT and hPXR-TG FVB/NJ mice.** Two-way hierarchical clustering of the mean differentially abundant taxa in fecal samples from adolescent- and adult-aged male and female WT and hPXR-TG FVB/NJ mice, as generated by the R packages gplots and RColorBrewer. Asterisks (\*) represent statistically significant differences compared to WT mice ( $t$ -test,  $P < 0.05$ ).

**Figure S10**

**Functional predictions**

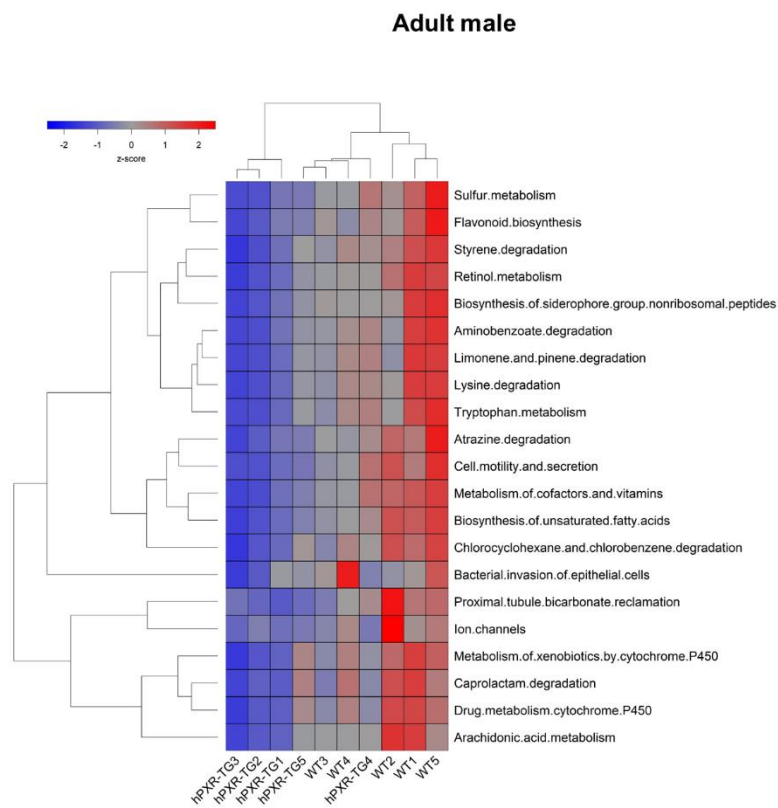

**Figure S10. Functional predictions in WT and hPXR-TG FVB/NJ mice.** Two-way hierarchical clustering dendrograms of differentially regulated KEGG pathways predicted by PICRUSt, as described in Materials and methods, from adolescent- and adult-aged male and female WT and hPXR-TG FVB/NJ mice ( $t$ -test,  $P < 0.05$ ). Generated by the R packages gplots and RColorBrewer.

Figure S11

A

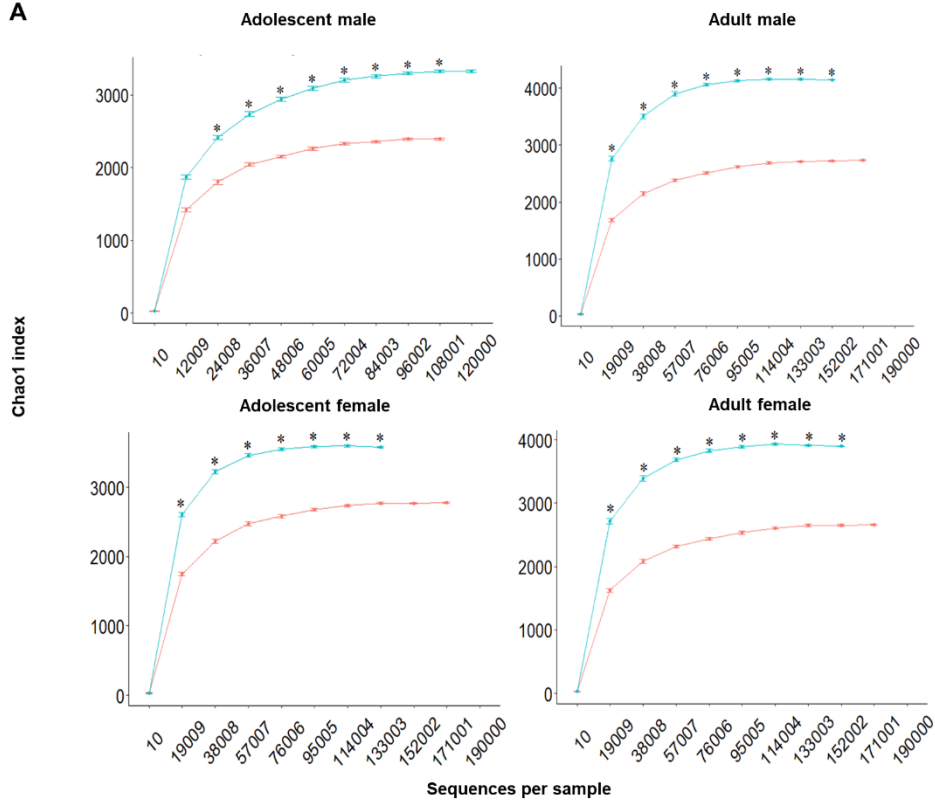

B

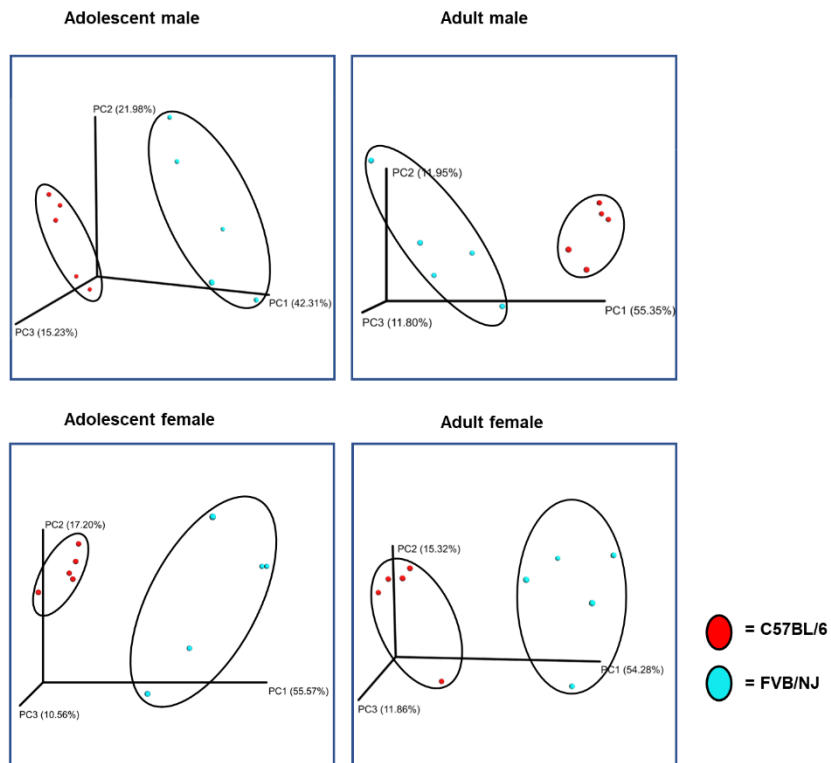

Figure S11 Alpha and beta diversities of C57BL/6 and FVB/NJ mice. A. Mean (SE) alpha diversity of gut microbiota within the low PXR/CAR expressors (C57BL/6) and high PXR/CAR expressors (FVB/NJ mice). Line plots were generated using the R package ggplot.



Asterisks (\*) represent statistically significant differences compared to C57BL/6 mice (*t*-test,  $P < 0.05$ ). **B.** Principal coordinate analysis (PCoA) plots showing the beta diversities of adolescent male, adult male, adolescent female, and adult female C57BL/6 and FVB/NJ mice.

Figure S12

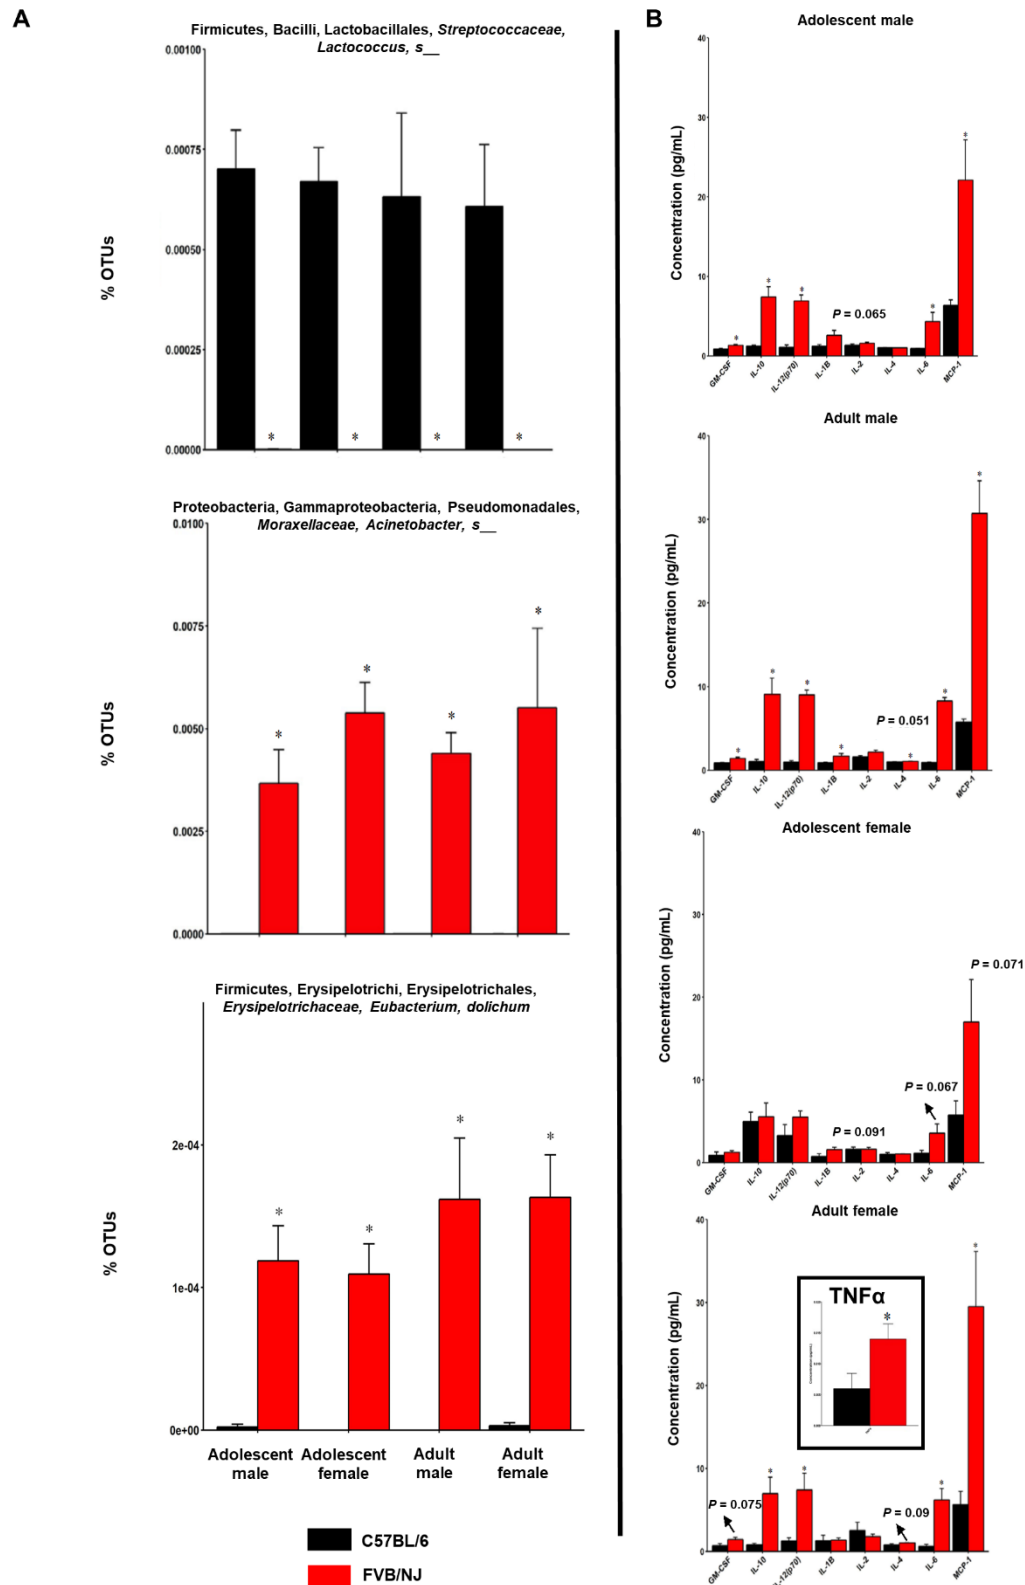

Figure S12 Percentage OTUs of *Lactococcus* sp., *Acinetobacter* sp., and *E. dolichum*, and cytokine concentrations in C57BL/6 and FVB/NJ mice. A. Individual bar plots of mean (SE) percentage OTUs of *Lactococcus* sp., *Acinetobacter* sp., and *E. dolichum*, are generated by the

R package ggplot2. Asterisks (\*) represent statistically significant differences compared to C57BL/6 mice ( $t$ -test,  $P < 0.05$ ). **B.** Bar plots of cytokine concentrations (pg/mL) are generated by the R package ggplot2. Asterisks (\*) represent statistically significant differences compared to C57BL/6 mice ( $t$ -test,  $P < 0.05$ ).



Figure S14

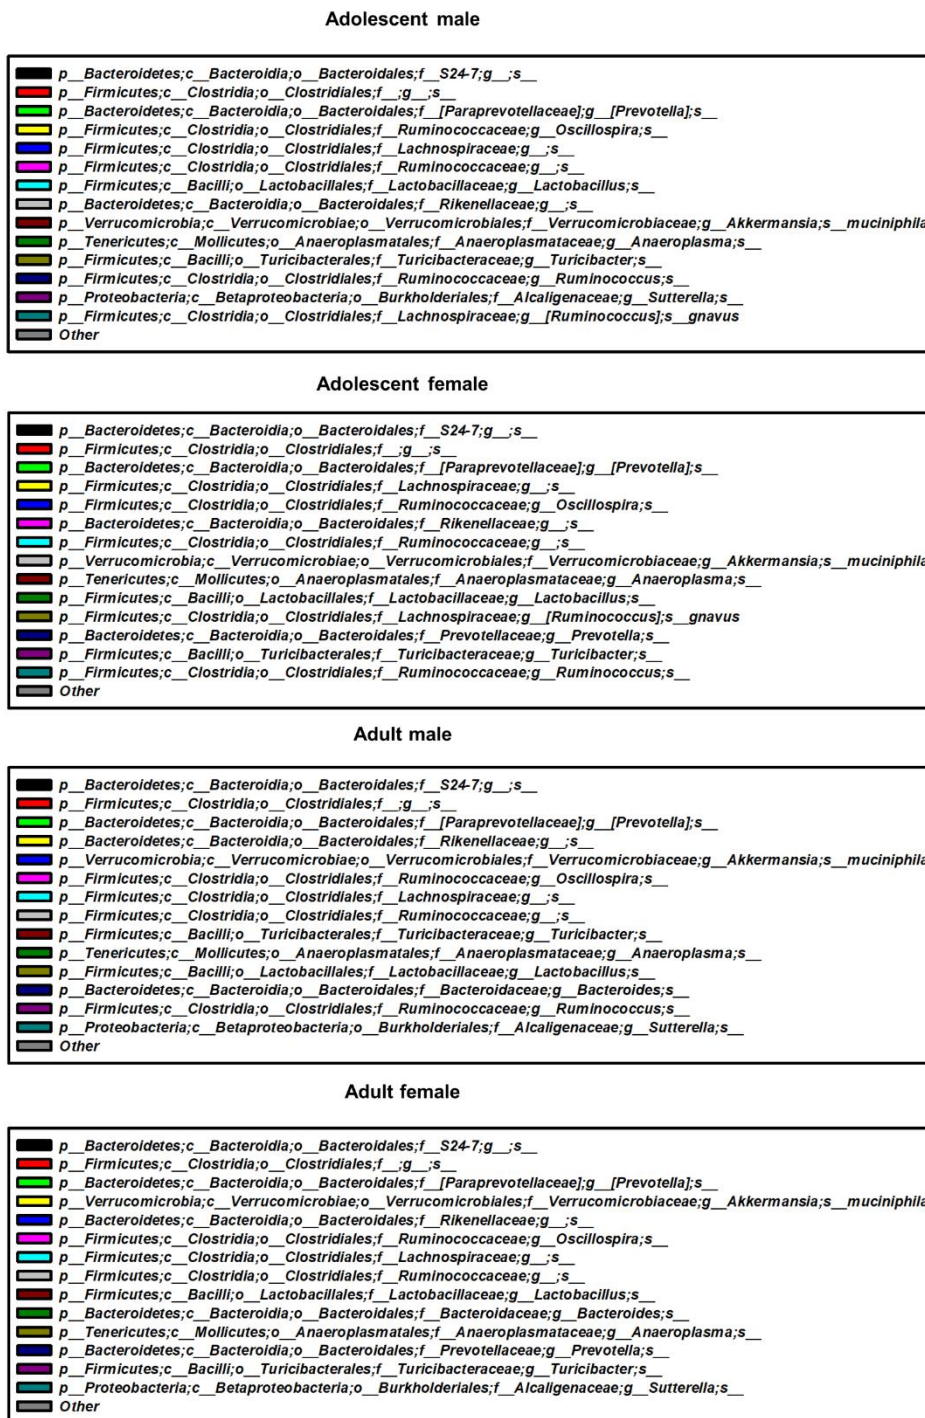

Figure S14 Figure legend for Fig. 8.

Figure S15

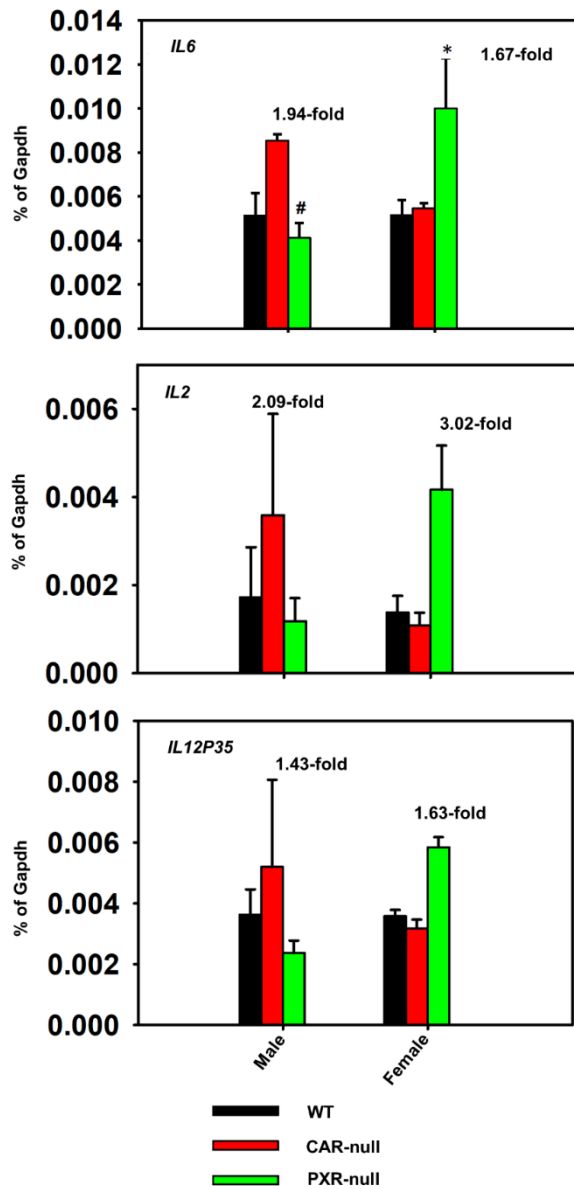

**Figure S15 RT-qPCR of liver cytokines in adult WT, *CAR*-null, and *PXR*-null mice.** Mean (SE) data are expressed at % of the house-keeping gene *Gapdh*. Asterisks (\*) represent statistically significant differences compared to controls, and pound symbols (#) represent statistically significant sex differences (two-way ANOVA,  $P < 0.05$ ).

Figure S16

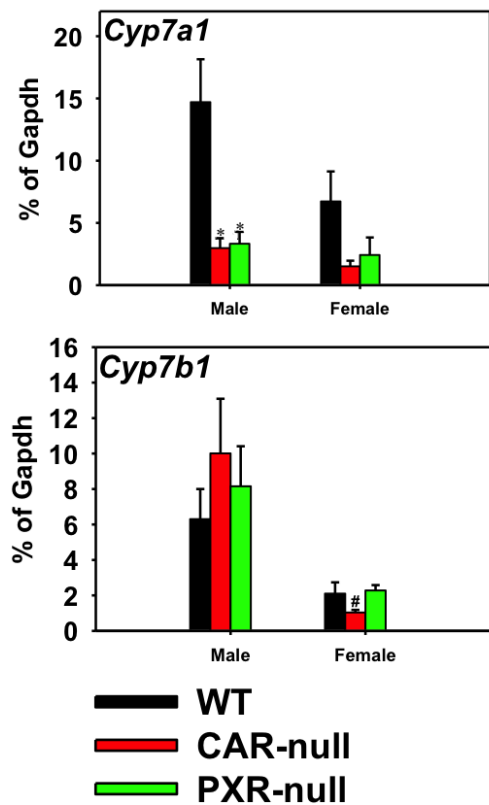

Figure S16 RT-qPCR of BA synthesis enzymes in adult WT, *CAR*-null, and *PXR*-null mice.

Mean (SE) data are expressed at % of the house-keeping gene *Gapdh*. Asterisks (\*) represent statistically significant differences compared to controls, and pound symbols (#) represent statistically significant sex differences (two-way ANOVA,  $P < 0.05$ ).
