# Supplementary material for: Understanding the physiological functions of the host xenobiotic-sensing nuclear receptors PXR and CAR on the gut microbiome using genetically modified mice
Source: PubMed Central journal article supplement — Acta Pharm Sin B. 2021 Jul 29;12(2):801–20. doi: 10.1016/j.apsb.2021.07.022 (PMC8897037; doi:10.1016/j.apsb.2021.07.022), 2021-07-29
Supplement: mmc2.pdf [file mmc2.pdf]

**Supporting Information for**

**Original article**

**Understanding the physiological functions of the host xenobiotic-sensing nuclear receptors PXR and CAR on the gut microbiome using genetically modified mice**

**Mallory Little<sup>a</sup>, Moumita Dutta<sup>a</sup>, Hao Li<sup>b</sup>, Adam Matson<sup>c</sup>, Xiaojian Shi<sup>d</sup>, Gabby Mascarinas<sup>a</sup>, Bruk Molla<sup>a</sup>, Kris Weigel<sup>a</sup>, Haiwei Gu<sup>d,\*</sup>, Sridhar Mani<sup>b,\*</sup>, Julia Yue Cui<sup>a,\*</sup>**

*<sup>a</sup>Department of Environmental and Occupational Health Sciences, University of Washington, Seattle, WA 98105, USA*

*<sup>b</sup>Einstein College of Medicine, Bronx, NY 10461, USA*

*<sup>c</sup>University of Connecticut, Hartford, CT 06106, USA*

*<sup>d</sup>Arizona Metabolomics Laboratory, College of Health Solutions, Arizona State University, Phoenix, AZ 85004, USA*

Receive 2 March 2021; received in revised form 29 May 2021; accepted 9 July 2021

\*Corresponding authors. Tel.: +1 206 616 4331.

E-mail addresses: [juliacui@uw.edu](mailto:juliacui@uw.edu) (Julia Yue Cui), [haiweigu@asu.edu](mailto:haiweigu@asu.edu) (Haiwei Gu), [sridhar.mani@einstein.yu.edu](mailto:sridhar.mani@einstein.yu.edu) (Sridhar Mani).

### Section 3. Statistical analysis of both male and female microbiome data in receptor null mice (two-way ANOVA).

#### I. Day 30 adolescent age: 315 bacteria that were detected in both sexes, below are the statistical analyses using two-way ANOVA in R)

"k\_\_Bacteria.p\_\_Acidobacteria.c\_\_Chloracidobacteria..o\_\_RB41.f\_\_g\_\_s\_\_"

|              | Df | Sum Sq    | Mean Sq   | F value | Pr(>F)   |
|--------------|----|-----------|-----------|---------|----------|
| Genotype     | 3  | 2.451e-09 | 8.171e-10 | 3.091   | 0.0408 * |
| Sex          | 1  | 8.800e-11 | 8.800e-11 | 0.333   | 0.5681   |
| Genotype:Sex | 3  | 5.190e-10 | 1.729e-10 | 0.654   | 0.5863   |
| Residuals    | 32 | 8.460e-09 | 2.644e-10 |         |          |

---

Signif. codes: 0 '\*\*\*' 0.001 '\*\*' 0.01 '\*' 0.05 '.' 0.1 ' ' 1

"k\_\_Bacteria.p\_\_Acidobacteria.c\_\_Chloracidobacteria..o\_\_RB41.f\_\_Ellin6075.g\_\_s\_\_"

|              | Df | Sum Sq    | Mean Sq   | F value | Pr(>F) |
|--------------|----|-----------|-----------|---------|--------|
| Genotype     | 3  | 2.240e-11 | 7.464e-12 | 0.300   | 0.825  |
| Sex          | 1  | 1.380e-11 | 1.375e-11 | 0.552   | 0.463  |
| Genotype:Sex | 3  | 9.000e-11 | 2.999e-11 | 1.203   | 0.324  |
| Residuals    | 32 | 7.973e-10 | 2.491e-11 |         |        |

"k\_\_Bacteria.p\_\_Acidobacteria.c\_\_Acidobacteria.6.o\_\_CCU21.f\_\_g\_\_s\_\_"

|              | Df | Sum Sq    | Mean Sq   | F value | Pr(>F) |
|--------------|----|-----------|-----------|---------|--------|
| Genotype     | 3  | 2.258e-10 | 7.526e-11 | 1.523   | 0.227  |
| Sex          | 1  | 7.250e-11 | 7.254e-11 | 1.468   | 0.235  |
| Genotype:Sex | 3  | 1.601e-10 | 5.337e-11 | 1.080   | 0.371  |
| Residuals    | 32 | 1.581e-09 | 4.942e-11 |         |        |

"k\_\_Bacteria.p\_\_Acidobacteria.c\_\_Acidobacteria.6.o\_\_iii1.15.f\_\_g\_\_s\_\_"

|              | Df | Sum Sq    | Mean Sq   | F value | Pr(>F) |
|--------------|----|-----------|-----------|---------|--------|
| Genotype     | 3  | 5.336e-09 | 1.779e-09 | 1.871   | 0.154  |
| Sex          | 1  | 2.100e-11 | 2.060e-11 | 0.022   | 0.884  |
| Genotype:Sex | 3  | 3.437e-09 | 1.146e-09 | 1.205   | 0.324  |
| Residuals    | 32 | 3.042e-08 | 9.506e-10 |         |        |

"k\_\_Bacteria.p\_\_Acidobacteria.c\_\_Acidobacteria.6.o\_\_iii1.15.f\_\_mb2424.g\_\_s\_\_"

|              | Df | Sum Sq    | Mean Sq   | F value | Pr(>F)   |
|--------------|----|-----------|-----------|---------|----------|
| Genotype     | 3  | 4.986e-10 | 1.662e-10 | 1.844   | 0.1591   |
| Sex          | 1  | 1.236e-10 | 1.237e-10 | 1.372   | 0.2502   |
| Genotype:Sex | 3  | 7.872e-10 | 2.624e-10 | 2.911   | 0.0495 * |
| Residuals    | 32 | 2.885e-09 | 9.014e-11 |         |          |

---

Signif. codes: 0 '\*\*\*' 0.001 '\*\*' 0.01 '\*' 0.05 '.' 0.1 ' ' 1

"k\_\_Bacteria.p\_\_Acidobacteria.c\_\_Acidobacteria.6.o\_\_iii1.15.f\_\_RB40.g\_\_s\_\_"

|              | Df | Sum Sq    | Mean Sq   | F value | Pr(>F) |
|--------------|----|-----------|-----------|---------|--------|
| Genotype     | 3  | 1.267e-11 | 4.224e-12 | 0.559   | 0.646  |
| Sex          | 1  | 5.400e-13 | 5.360e-13 | 0.071   | 0.792  |
| Genotype:Sex | 3  | 2.969e-11 | 9.898e-12 | 1.310   | 0.288  |
| Residuals    | 32 | 2.418e-10 | 7.558e-12 |         |        |

"k\_\_Bacteria.p\_\_Acidobacteria.c\_\_Acidobacteriia.o\_\_Acidobacteriales.f\_\_Acidobacteriaceae.g\_\_s\_\_"

|              | Df | Sum Sq    | Mean Sq   | F value | Pr(>F) |
|--------------|----|-----------|-----------|---------|--------|
| Genotype     | 3  | 7.030e-11 | 2.344e-11 | 1.314   | 0.287  |
| Sex          | 1  | 1.440e-11 | 1.445e-11 | 0.810   | 0.375  |
| Genotype:Sex | 3  | 6.250e-11 | 2.085e-11 | 1.169   | 0.337  |
| Residuals    | 32 | 5.708e-10 | 1.784e-11 |         |        |

"k\_\_Bacteria.p\_\_Acidobacteria.c\_\_Acidobacteriia.o\_\_Acidobacteriales.f\_\_Koribacteraceae.g\_\_s\_\_"

|              | Df | Sum Sq    | Mean Sq   | F value | Pr(>F) |
|--------------|----|-----------|-----------|---------|--------|
| Genotype     | 3  | 6.550e-11 | 2.183e-11 | 0.869   | 0.467  |
| Sex          | 1  | 7.700e-12 | 7.719e-12 | 0.307   | 0.583  |
| Genotype:Sex | 3  | 9.150e-11 | 3.049e-11 | 1.214   | 0.321  |
| Residuals    | 32 | 8.038e-10 | 2.512e-11 |         |        |

"k\_\_Bacteria.p\_\_Acidobacteria.c\_\_Acidobacteriia.o\_\_Acidobacteriales.f\_\_Koribacteraceae.g\_\_Candidatus.Koribacter.s\_\_"

|              | Df | Sum Sq    | Mean Sq   | F value | Pr(>F)   |
|--------------|----|-----------|-----------|---------|----------|
| Genotype     | 3  | 1.739e-11 | 5.795e-12 | 1.682   | 0.1904   |
| Sex          | 1  | 0.000e+00 | 0.000e+00 | 0.000   | 0.9906   |
| Genotype:Sex | 3  | 3.477e-11 | 1.159e-11 | 3.365   | 0.0306 * |
| Residuals    | 32 | 1.102e-10 | 3.445e-12 |         |          |

---

Signif. codes: 0 '\*\*\*\*' 0.001 '\*\*\*' 0.01 '\*\*' 0.05 '.' 0.1 ' ' 1

"k\_\_Bacteria.p\_\_Acidobacteria.c\_\_iii1.8.o\_\_32.20.f\_\_g\_\_s\_\_"

|              | Df | Sum Sq    | Mean Sq   | F value | Pr(>F) |
|--------------|----|-----------|-----------|---------|--------|
| Genotype     | 3  | 3.880e-11 | 1.293e-11 | 0.425   | 0.736  |
| Sex          | 1  | 1.800e-12 | 1.782e-12 | 0.059   | 0.810  |
| Genotype:Sex | 3  | 3.710e-11 | 1.237e-11 | 0.407   | 0.749  |
| Residuals    | 32 | 9.727e-10 | 3.040e-11 |         |        |

"k\_\_Bacteria.p\_\_Acidobacteria.c\_\_iii1.8.o\_\_DS.18.f\_\_g\_\_s\_\_"

|              | Df | Sum Sq    | Mean Sq   | F value | Pr(>F) |
|--------------|----|-----------|-----------|---------|--------|
| Genotype     | 3  | 6.940e-10 | 2.312e-10 | 0.527   | 0.667  |
| Sex          | 1  | 3.200e-11 | 3.190e-11 | 0.073   | 0.789  |
| Genotype:Sex | 3  | 4.400e-10 | 1.468e-10 | 0.334   | 0.800  |
| Residuals    | 32 | 1.405e-08 | 4.390e-10 |         |        |

"k\_\_Bacteria.p\_\_Acidobacteria.c\_\_Solibacteres.o\_\_Solibacterales.f\_\_g\_\_s\_\_"

|              | Df | Sum Sq    | Mean Sq   | F value | Pr(>F)   |
|--------------|----|-----------|-----------|---------|----------|
| Genotype     | 3  | 4.910e-11 | 1.638e-11 | 0.898   | 0.4528   |
| Sex          | 1  | 5.310e-11 | 5.312e-11 | 2.913   | 0.0976 . |
| Genotype:Sex | 3  | 3.110e-11 | 1.038e-11 | 0.569   | 0.6394   |
| Residuals    | 32 | 5.836e-10 | 1.824e-11 |         |          |

---

Signif. codes: 0 '\*\*\*\*' 0.001 '\*\*\*' 0.01 '\*\*' 0.05 '.' 0.1 ' ' 1

"k\_\_Bacteria.p\_\_Acidobacteria.c\_\_Solibacteres.o\_\_Solibacterales.f\_\_Solibacteraceae.g\_\_s\_\_"

|  | Df | Sum Sq | Mean Sq | F value | Pr(>F) |
|--|----|--------|---------|---------|--------|
|--|----|--------|---------|---------|--------|

|              |    |           |           |       |       |
|--------------|----|-----------|-----------|-------|-------|
| Genotype     | 3  | 3.660e-11 | 1.221e-11 | 1.221 | 0.318 |
| Sex          | 1  | 0.000e+00 | 1.400e-14 | 0.001 | 0.970 |
| Genotype:Sex | 3  | 3.900e-11 | 1.299e-11 | 1.298 | 0.292 |
| Residuals    | 32 | 3.201e-10 | 1.000e-11 |       |       |

"k\_\_Bacteria.p\_\_Acidobacteria.c\_\_Sva0725.o\_\_Sva0725.f\_\_g\_\_s\_\_"

|              | Df | Sum Sq    | Mean Sq   | F value | Pr(>F)   |
|--------------|----|-----------|-----------|---------|----------|
| Genotype     | 3  | 5.935e-10 | 1.978e-10 | 3.735   | 0.0208 * |
| Sex          | 1  | 6.250e-11 | 6.246e-11 | 1.179   | 0.2856   |
| Genotype:Sex | 3  | 3.291e-10 | 1.097e-10 | 2.071   | 0.1236   |
| Residuals    | 32 | 1.695e-09 | 5.296e-11 |         |          |

---

Signif. codes: 0 '\*\*\*\*' 0.001 '\*\*' 0.01 '\*' 0.05 '.' 0.1 ' ' 1

"k\_\_Bacteria.p\_\_Actinobacteria.c\_\_Acidimicrobia.o\_\_Acidimicrobiales.f\_\_g\_\_s\_\_"

|              | Df | Sum Sq    | Mean Sq   | F value | Pr(>F)   |
|--------------|----|-----------|-----------|---------|----------|
| Genotype     | 3  | 1.002e-09 | 3.340e-10 | 3.342   | 0.0313 * |
| Sex          | 1  | 1.830e-10 | 1.833e-10 | 1.834   | 0.1852   |
| Genotype:Sex | 3  | 1.820e-10 | 6.070e-11 | 0.607   | 0.6151   |
| Residuals    | 32 | 3.198e-09 | 9.990e-11 |         |          |

---

Signif. codes: 0 '\*\*\*\*' 0.001 '\*\*' 0.01 '\*' 0.05 '.' 0.1 ' ' 1

"k\_\_Bacteria.p\_\_Actinobacteria.c\_\_Acidimicrobia.o\_\_Acidimicrobiales.f\_\_AKIW874.g\_\_s\_\_"

|              | Df | Sum Sq    | Mean Sq   | F value | Pr(>F)   |
|--------------|----|-----------|-----------|---------|----------|
| Genotype     | 3  | 1.828e-11 | 6.093e-12 | 2.291   | 0.0971 . |
| Sex          | 1  | 0.000e+00 | 3.000e-15 | 0.001   | 0.9715   |
| Genotype:Sex | 3  | 6.550e-12 | 2.184e-12 | 0.821   | 0.4918   |
| Residuals    | 32 | 8.512e-11 | 2.660e-12 |         |          |

---

Signif. codes: 0 '\*\*\*\*' 0.001 '\*\*' 0.01 '\*' 0.05 '.' 0.1 ' ' 1

"k\_\_Bacteria.p\_\_Actinobacteria.c\_\_Acidimicrobia.o\_\_Acidimicrobiales.f\_\_C111.g\_\_s\_\_"

|              | Df | Sum Sq    | Mean Sq   | F value | Pr(>F)   |
|--------------|----|-----------|-----------|---------|----------|
| Genotype     | 3  | 1.584e-11 | 5.280e-12 | 1.568   | 0.2162   |
| Sex          | 1  | 3.520e-12 | 3.521e-12 | 1.046   | 0.3141   |
| Genotype:Sex | 3  | 2.700e-11 | 9.001e-12 | 2.673   | 0.0639 . |
| Residuals    | 32 | 1.077e-10 | 3.367e-12 |         |          |

---

Signif. codes: 0 '\*\*\*\*' 0.001 '\*\*' 0.01 '\*' 0.05 '.' 0.1 ' ' 1

"k\_\_Bacteria.p\_\_Actinobacteria.c\_\_Acidimicrobia.o\_\_Acidimicrobiales.f\_\_EB1017.g\_\_s\_\_"

|              | Df | Sum Sq    | Mean Sq   | F value | Pr(>F)   |
|--------------|----|-----------|-----------|---------|----------|
| Genotype     | 3  | 3.034e-10 | 1.011e-10 | 3.936   | 0.0169 * |
| Sex          | 1  | 1.450e-11 | 1.454e-11 | 0.566   | 0.4574   |
| Genotype:Sex | 3  | 4.730e-11 | 1.576e-11 | 0.614   | 0.6112   |
| Residuals    | 32 | 8.221e-10 | 2.569e-11 |         |          |

---

Signif. codes: 0 '\*\*\*\*' 0.001 '\*\*' 0.01 '\*' 0.05 '.' 0.1 ' ' 1

"k\_\_Bacteria.p\_\_Actinobacteria.c\_\_Actinobacteria.o\_\_Actinomycetales.f\_\_g\_\_s\_\_"

|              | Df | Sum Sq    | Mean Sq   | F value | Pr(>F) |
|--------------|----|-----------|-----------|---------|--------|
| Genotype     | 3  | 1.806e-09 | 6.020e-10 | 1.340   | 0.279  |
| Sex          | 1  | 3.250e-10 | 3.254e-10 | 0.724   | 0.401  |
| Genotype:Sex | 3  | 2.037e-09 | 6.791e-10 | 1.511   | 0.230  |
| Residuals    | 32 | 1.438e-08 | 4.493e-10 |         |        |

"k\_\_Bacteria.p\_\_Actinobacteria.c\_\_Actinobacteria.o\_\_Actinomycetales.f\_\_Actinosynnemataceae.g\_\_Le  
ntzea.Other"

|              | Df | Sum Sq    | Mean Sq   | F value | Pr(>F) |
|--------------|----|-----------|-----------|---------|--------|
| Genotype     | 3  | 1.417e-11 | 4.723e-12 | 0.997   | 0.407  |
| Sex          | 1  | 1.000e-14 | 1.200e-14 | 0.003   | 0.960  |
| Genotype:Sex | 3  | 2.830e-11 | 9.433e-12 | 1.991   | 0.135  |
| Residuals    | 32 | 1.516e-10 | 4.737e-12 |         |        |

"k\_\_Bacteria.p\_\_Actinobacteria.c\_\_Actinobacteria.o\_\_Actinomycetales.f\_\_Corynebacteriaceae.g\_\_Cory  
nebacterium.s\_\_"

|              | Df | Sum Sq    | Mean Sq   | F value | Pr(>F)   |
|--------------|----|-----------|-----------|---------|----------|
| Genotype     | 3  | 2.490e-10 | 8.300e-11 | 0.906   | 0.4492   |
| Sex          | 1  | 3.202e-10 | 3.202e-10 | 3.493   | 0.0708 . |
| Genotype:Sex | 3  | 7.216e-10 | 2.405e-10 | 2.624   | 0.0674 . |
| Residuals    | 32 | 2.933e-09 | 9.170e-11 |         |          |

---

Signif. codes: 0 '\*\*\*' 0.001 '\*\*' 0.01 '\*' 0.05 '.' 0.1 ' ' 1

"k\_\_Bacteria.p\_\_Actinobacteria.c\_\_Actinobacteria.o\_\_Actinomycetales.f\_\_Geodermatophilaceae.g\_\_s  
\_\_"

|              | Df | Sum Sq    | Mean Sq   | F value | Pr(>F)   |
|--------------|----|-----------|-----------|---------|----------|
| Genotype     | 3  | 9.100e-12 | 3.040e-12 | 0.069   | 0.9760   |
| Sex          | 1  | 8.200e-12 | 8.210e-12 | 0.186   | 0.6688   |
| Genotype:Sex | 3  | 3.823e-10 | 1.274e-10 | 2.893   | 0.0504 . |
| Residuals    | 32 | 1.409e-09 | 4.405e-11 |         |          |

---

Signif. codes: 0 '\*\*\*' 0.001 '\*\*' 0.01 '\*' 0.05 '.' 0.1 ' ' 1

"k\_\_Bacteria.p\_\_Actinobacteria.c\_\_Actinobacteria.o\_\_Actinomycetales.f\_\_Intrasporangiaceae.g\_\_s\_\_"

|              | Df | Sum Sq    | Mean Sq   | F value | Pr(>F) |
|--------------|----|-----------|-----------|---------|--------|
| Genotype     | 3  | 2.820e-11 | 9.404e-12 | 0.507   | 0.680  |
| Sex          | 1  | 3.100e-12 | 3.058e-12 | 0.165   | 0.687  |
| Genotype:Sex | 3  | 6.810e-11 | 2.271e-11 | 1.226   | 0.316  |
| Residuals    | 32 | 5.931e-10 | 1.853e-11 |         |        |

"k\_\_Bacteria.p\_\_Actinobacteria.c\_\_Actinobacteria.o\_\_Actinomycetales.f\_\_Intrasporangiaceae.g\_\_Phyci  
coccus.s\_\_"

|              | Df | Sum Sq    | Mean Sq   | F value | Pr(>F) |
|--------------|----|-----------|-----------|---------|--------|
| Genotype     | 3  | 3.270e-11 | 1.090e-11 | 1.126   | 0.353  |
| Sex          | 1  | 2.720e-12 | 2.722e-12 | 0.281   | 0.599  |
| Genotype:Sex | 3  | 5.722e-11 | 1.907e-11 | 1.971   | 0.138  |
| Residuals    | 32 | 3.097e-10 | 9.677e-12 |         |        |

"k\_\_Bacteria.p\_\_Actinobacteria.c\_\_Actinobacteria.o\_\_Actinomycetales.f\_\_Intrasporangiaceae.Other.Other"

|              | Df | Sum Sq    | Mean Sq   | F value | Pr(>F) |
|--------------|----|-----------|-----------|---------|--------|
| Genotype     | 3  | 9.490e-12 | 3.163e-12 | 0.597   | 0.622  |
| Sex          | 1  | 2.540e-12 | 2.540e-12 | 0.479   | 0.494  |
| Genotype:Sex | 3  | 3.442e-11 | 1.147e-11 | 2.165   | 0.111  |
| Residuals    | 32 | 1.696e-10 | 5.300e-12 |         |        |

"k\_\_Bacteria.p\_\_Actinobacteria.c\_\_Actinobacteria.o\_\_Actinomycetales.f\_\_Microbacteriaceae.g\_\_s\_\_"

|              | Df | Sum Sq    | Mean Sq   | F value | Pr(>F) |
|--------------|----|-----------|-----------|---------|--------|
| Genotype     | 3  | 5.690e-12 | 1.896e-12 | 0.453   | 0.717  |
| Sex          | 1  | 0.000e+00 | 2.000e-15 | 0.000   | 0.984  |
| Genotype:Sex | 3  | 1.675e-11 | 5.584e-12 | 1.333   | 0.281  |
| Residuals    | 32 | 1.340e-10 | 4.188e-12 |         |        |

"k\_\_Bacteria.p\_\_Actinobacteria.c\_\_Actinobacteria.o\_\_Actinomycetales.f\_\_Microbacteriaceae.g\_\_Agromyces.s\_\_"

|              | Df | Sum Sq    | Mean Sq   | F value | Pr(>F) |
|--------------|----|-----------|-----------|---------|--------|
| Genotype     | 3  | 4.640e-11 | 1.547e-11 | 0.887   | 0.458  |
| Sex          | 1  | 3.500e-12 | 3.522e-12 | 0.202   | 0.656  |
| Genotype:Sex | 3  | 5.850e-11 | 1.949e-11 | 1.117   | 0.357  |
| Residuals    | 32 | 5.583e-10 | 1.745e-11 |         |        |

"k\_\_Bacteria.p\_\_Actinobacteria.c\_\_Actinobacteria.o\_\_Actinomycetales.f\_\_Microbacteriaceae.g\_\_Salinibacterium.s\_\_"

|              | Df | Sum Sq    | Mean Sq   | F value | Pr(>F) |
|--------------|----|-----------|-----------|---------|--------|
| Genotype     | 3  | 2.056e-11 | 6.853e-12 | 0.977   | 0.416  |
| Sex          | 1  | 7.900e-13 | 7.940e-13 | 0.113   | 0.739  |
| Genotype:Sex | 3  | 1.545e-11 | 5.151e-12 | 0.734   | 0.539  |
| Residuals    | 32 | 2.244e-10 | 7.013e-12 |         |        |

"k\_\_Bacteria.p\_\_Actinobacteria.c\_\_Actinobacteria.o\_\_Actinomycetales.f\_\_Micrococcaceae.g\_\_s\_\_"

|              | Df | Sum Sq    | Mean Sq   | F value | Pr(>F) |
|--------------|----|-----------|-----------|---------|--------|
| Genotype     | 3  | 3.940e-10 | 1.312e-10 | 0.624   | 0.605  |
| Sex          | 1  | 7.800e-11 | 7.770e-11 | 0.369   | 0.548  |
| Genotype:Sex | 3  | 1.188e-09 | 3.962e-10 | 1.884   | 0.152  |
| Residuals    | 32 | 6.727e-09 | 2.102e-10 |         |        |

"k\_\_Bacteria.p\_\_Actinobacteria.c\_\_Actinobacteria.o\_\_Actinomycetales.f\_\_Micrococcaceae.g\_\_Arthroacter.Other"

|              | Df | Sum Sq    | Mean Sq   | F value | Pr(>F)  |
|--------------|----|-----------|-----------|---------|---------|
| Genotype     | 3  | 2.001e-10 | 6.672e-11 | 1.561   | 0.218   |
| Sex          | 1  | 2.124e-10 | 2.124e-10 | 4.968   | 0.033 * |
| Genotype:Sex | 3  | 9.180e-11 | 3.061e-11 | 0.716   | 0.550   |
| Residuals    | 32 | 1.368e-09 | 4.275e-11 |         |         |

---

Signif. codes: 0 '\*\*\*' 0.001 '\*\*' 0.01 '\*' 0.05 '.' 0.1 ' ' 1

"k\_\_Bacteria.p\_\_Actinobacteria.c\_\_Actinobacteria.o\_\_Actinomycetales.f\_\_Micrococcaceae.g\_\_Micrococcus.s\_\_"

|              | Df | Sum Sq    | Mean Sq   | F value | Pr(>F) |
|--------------|----|-----------|-----------|---------|--------|
| Genotype     | 3  | 4.850e-11 | 1.618e-11 | 0.587   | 0.628  |
| Sex          | 1  | 8.600e-12 | 8.630e-12 | 0.313   | 0.580  |
| Genotype:Sex | 3  | 1.017e-10 | 3.390e-11 | 1.229   | 0.315  |
| Residuals    | 32 | 8.826e-10 | 2.758e-11 |         |        |

"k\_\_Bacteria.p\_\_Actinobacteria.c\_\_Actinobacteria.o\_\_Actinomycetales.f\_\_Micrococcaceae.Other.Other"

|              | Df | Sum Sq    | Mean Sq   | F value | Pr(>F) |
|--------------|----|-----------|-----------|---------|--------|
| Genotype     | 3  | 3.601e-11 | 1.200e-11 | 1.253   | 0.307  |
| Sex          | 1  | 0.000e+00 | 0.000e+00 | 0.000   | 0.996  |
| Genotype:Sex | 3  | 2.833e-11 | 9.444e-12 | 0.986   | 0.412  |
| Residuals    | 32 | 3.066e-10 | 9.582e-12 |         |        |

"k\_\_Bacteria.p\_\_Actinobacteria.c\_\_Actinobacteria.o\_\_Actinomycetales.f\_\_Micromonosporaceae.g\_\_s\_\_"

|              | Df | Sum Sq    | Mean Sq   | F value | Pr(>F) |
|--------------|----|-----------|-----------|---------|--------|
| Genotype     | 3  | 1.207e-11 | 4.025e-12 | 0.971   | 0.418  |
| Sex          | 1  | 0.000e+00 | 0.000e+00 | 0.000   | 0.996  |
| Genotype:Sex | 3  | 2.415e-11 | 8.050e-12 | 1.943   | 0.143  |
| Residuals    | 32 | 1.326e-10 | 4.144e-12 |         |        |

"k\_\_Bacteria.p\_\_Actinobacteria.c\_\_Actinobacteria.o\_\_Actinomycetales.f\_\_Micromonosporaceae.Other.Other"

|              | Df | Sum Sq    | Mean Sq   | F value | Pr(>F) |
|--------------|----|-----------|-----------|---------|--------|
| Genotype     | 3  | 1.940e-11 | 6.460e-12 | 0.596   | 0.622  |
| Sex          | 1  | 1.220e-11 | 1.221e-11 | 1.127   | 0.296  |
| Genotype:Sex | 3  | 5.500e-12 | 1.845e-12 | 0.170   | 0.916  |
| Residuals    | 32 | 3.467e-10 | 1.084e-11 |         |        |

"k\_\_Bacteria.p\_\_Actinobacteria.c\_\_Actinobacteria.o\_\_Actinomycetales.f\_\_Nocardiaceae.g\_\_Rhodococcus.s\_\_"

|          | Df | Sum Sq    | Mean Sq   | F value | Pr(>F)   |
|----------|----|-----------|-----------|---------|----------|
| Genotype | 3  | 1.523e-09 | 5.077e-10 | 2.928   | 0.0486 * |

|              |    |           |           |       |        |   |
|--------------|----|-----------|-----------|-------|--------|---|
| Sex          | 1  | 5.320e-10 | 5.320e-10 | 3.068 | 0.0894 | . |
| Genotype:Sex | 3  | 1.871e-09 | 6.236e-10 | 3.597 | 0.0240 | * |
| Residuals    | 32 | 5.548e-09 | 1.734e-10 |       |        |   |

---

Signif. codes: 0 '\*\*\*\*' 0.001 '\*\*' 0.01 '\*' 0.05 '.' 0.1 ' ' 1

"k\_\_Bacteria.p\_\_Actinobacteria.c\_\_Actinobacteria.o\_\_Actinomycetales.f\_\_Nocardioideaceae.g\_\_s\_\_"

|              | Df | Sum Sq    | Mean Sq   | F value | Pr(>F) |
|--------------|----|-----------|-----------|---------|--------|
| Genotype     | 3  | 8.160e-10 | 2.720e-10 | 2.211   | 0.106  |
| Sex          | 1  | 1.720e-10 | 1.722e-10 | 1.400   | 0.245  |
| Genotype:Sex | 3  | 5.010e-10 | 1.671e-10 | 1.358   | 0.273  |
| Residuals    | 32 | 3.937e-09 | 1.230e-10 |         |        |

"k\_\_Bacteria.p\_\_Actinobacteria.c\_\_Actinobacteria.o\_\_Actinomycetales.f\_\_Nocardioideaceae.g\_\_Kribbell  
a.s\_\_"

|              | Df | Sum Sq    | Mean Sq   | F value | Pr(>F) |
|--------------|----|-----------|-----------|---------|--------|
| Genotype     | 3  | 1.202e-11 | 4.007e-12 | 0.96    | 0.424  |
| Sex          | 1  | 0.000e+00 | 1.000e-15 | 0.00    | 0.986  |
| Genotype:Sex | 3  | 2.404e-11 | 8.013e-12 | 1.92    | 0.146  |
| Residuals    | 32 | 1.336e-10 | 4.174e-12 |         |        |

"k\_\_Bacteria.p\_\_Actinobacteria.c\_\_Actinobacteria.o\_\_Actinomycetales.f\_\_Nocardioideaceae.g\_\_Nocardii  
oides.s\_\_"

|              | Df | Sum Sq    | Mean Sq   | F value | Pr(>F) |
|--------------|----|-----------|-----------|---------|--------|
| Genotype     | 3  | 3.850e-11 | 1.284e-11 | 0.872   | 0.4660 |
| Sex          | 1  | 0.000e+00 | 2.000e-14 | 0.001   | 0.9698 |
| Genotype:Sex | 3  | 1.121e-10 | 3.736e-11 | 2.535   | 0.0742 |
| Residuals    | 32 | 4.715e-10 | 1.474e-11 |         |        |

---

Signif. codes: 0 '\*\*\*\*' 0.001 '\*\*' 0.01 '\*' 0.05 '.' 0.1 ' ' 1

**II. Day 60 adult age: 315 bacteria that were detected in both sexes, below are the statistical analyses using two-way ANOVA in R)**

"k\_\_Bacteria.p\_\_Acidobacteria.c\_\_Chloracidobacteria.o\_\_RB41.f\_\_g\_\_s\_\_"

|              | Df | Sum Sq    | Mean Sq   | F value | Pr(>F)     |
|--------------|----|-----------|-----------|---------|------------|
| Genotype     | 3  | 2.427e-09 | 8.089e-10 | 4.518   | 0.00944 ** |
| Sex          | 1  | 7.500e-11 | 7.510e-11 | 0.420   | 0.52177    |
| Genotype:Sex | 3  | 6.470e-10 | 2.157e-10 | 1.205   | 0.32378    |
| Residuals    | 32 | 5.730e-09 | 1.791e-10 |         |            |

---

Signif. codes: 0 '\*\*\*\*' 0.001 '\*\*' 0.01 '\*' 0.05 '.' 0.1 ' ' 1

"k\_\_Bacteria.p\_\_Acidobacteria.c\_\_Chloracidobacteria.o\_\_RB41.f\_\_Ellin6075.g\_\_s\_\_"

|              | Df | Sum Sq    | Mean Sq   | F value | Pr(>F)   |
|--------------|----|-----------|-----------|---------|----------|
| Genotype     | 3  | 2.452e-10 | 8.174e-11 | 3.941   | 0.0168 * |
| Sex          | 1  | 1.200e-12 | 1.250e-12 | 0.060   | 0.8077   |
| Genotype:Sex | 3  | 9.640e-11 | 3.213e-11 | 1.549   | 0.2208   |



Residuals 32 6.637e-10 2.074e-11

---

Signif. codes: 0 '\*\*\*\*' 0.001 '\*\*' 0.01 '\*' 0.05 '.' 0.1 ' ' 1

"k\_\_Bacteria.p\_\_Acidobacteria.c\_\_Acidobacteria.6.o\_\_CCU21.f\_\_g\_\_s\_\_"

|              | Df | Sum Sq    | Mean Sq   | F value | Pr(>F) |
|--------------|----|-----------|-----------|---------|--------|
| Genotype     | 3  | 1.695e-10 | 5.651e-11 | 0.858   | 0.473  |
| Sex          | 1  | 1.190e-11 | 1.190e-11 | 0.181   | 0.674  |
| Genotype:Sex | 3  | 3.034e-10 | 1.011e-10 | 1.536   | 0.224  |

Residuals 32 2.107e-09 6.585e-11

"k\_\_Bacteria.p\_\_Acidobacteria.c\_\_Acidobacteria.6.o\_\_iii1.15.f\_\_g\_\_s\_\_"

|              | Df | Sum Sq    | Mean Sq   | F value | Pr(>F)     |
|--------------|----|-----------|-----------|---------|------------|
| Genotype     | 3  | 1.184e-08 | 3.948e-09 | 5.596   | 0.00335 ** |
| Sex          | 1  | 3.300e-11 | 3.300e-11 | 0.047   | 0.82929    |
| Genotype:Sex | 3  | 7.806e-09 | 2.602e-09 | 3.688   | 0.02182 *  |

Residuals 32 2.257e-08 7.050e-10

---

Signif. codes: 0 '\*\*\*\*' 0.001 '\*\*' 0.01 '\*' 0.05 '.' 0.1 ' ' 1

"k\_\_Bacteria.p\_\_Acidobacteria.c\_\_Acidobacteria.6.o\_\_iii1.15.f\_\_mb2424.g\_\_s\_\_"

|              | Df | Sum Sq    | Mean Sq   | F value | Pr(>F) |
|--------------|----|-----------|-----------|---------|--------|
| Genotype     | 3  | 1.994e-10 | 6.646e-11 | 0.926   | 0.440  |
| Sex          | 1  | 6.330e-11 | 6.327e-11 | 0.881   | 0.355  |
| Genotype:Sex | 3  | 1.510e-10 | 5.032e-11 | 0.701   | 0.559  |

Residuals 32 2.298e-09 7.180e-11

"k\_\_Bacteria.p\_\_Acidobacteria.c\_\_Acidobacteria.6.o\_\_iii1.15.f\_\_RB40.g\_\_s\_\_"

|              | Df | Sum Sq    | Mean Sq   | F value | Pr(>F) |
|--------------|----|-----------|-----------|---------|--------|
| Genotype     | 3  | 1.176e-11 | 3.920e-12 | 0.963   | 0.422  |
| Sex          | 1  | 0.000e+00 | 0.000e+00 | 0.000   | 0.992  |
| Genotype:Sex | 3  | 2.352e-11 | 7.840e-12 | 1.926   | 0.145  |

Residuals 32 1.303e-10 4.071e-12

"k\_\_Bacteria.p\_\_Acidobacteria.c\_\_Acidobacteriia.o\_\_Acidobacteriales.f\_\_Acidobacteriaceae.g\_\_s\_\_"

|              | Df | Sum Sq    | Mean Sq   | F value | Pr(>F)   |
|--------------|----|-----------|-----------|---------|----------|
| Genotype     | 3  | 7.050e-11 | 2.350e-11 | 1.126   | 0.3530   |
| Sex          | 1  | 6.500e-11 | 6.501e-11 | 3.116   | 0.0871 . |
| Genotype:Sex | 3  | 1.250e-10 | 4.166e-11 | 1.997   | 0.1342   |

Residuals 32 6.675e-10 2.086e-11

---

Signif. codes: 0 '\*\*\*\*' 0.001 '\*\*' 0.01 '\*' 0.05 '.' 0.1 ' ' 1

"k\_\_Bacteria.p\_\_Acidobacteria.c\_\_Acidobacteriia.o\_\_Acidobacteriales.f\_\_Koribacteraceae.g\_\_s\_\_"

|              | Df | Sum Sq    | Mean Sq   | F value | Pr(>F)     |
|--------------|----|-----------|-----------|---------|------------|
| Genotype     | 3  | 1.944e-10 | 6.481e-11 | 2.979   | 0.04601 *  |
| Sex          | 1  | 3.800e-12 | 3.790e-12 | 0.174   | 0.67917    |
| Genotype:Sex | 3  | 3.434e-10 | 1.145e-10 | 5.262   | 0.00459 ** |

Residuals 32 6.962e-10 2.176e-11

---

Signif. codes: 0 '\*\*\*' 0.001 '\*\*' 0.01 '\*' 0.05 '.' 0.1 ' ' 1

"k\_\_Bacteria.p\_\_Acidobacteria.c\_\_Acidobacteriia.o\_\_Acidobacteriales.f\_\_Koribacteraceae.g\_\_Candidatus.Koribacter.s\_\_"

|              | Df | Sum Sq    | Mean Sq   | F value | Pr(>F)   |
|--------------|----|-----------|-----------|---------|----------|
| Genotype     | 3  | 6.458e-11 | 2.153e-11 | 2.550   | 0.0731 . |
| Sex          | 1  | 9.660e-12 | 9.660e-12 | 1.144   | 0.2928   |
| Genotype:Sex | 3  | 1.002e-10 | 3.340e-11 | 3.956   | 0.0166 * |
| Residuals    | 32 | 2.701e-10 | 8.440e-12 |         |          |

---

Signif. codes: 0 '\*\*\*' 0.001 '\*\*' 0.01 '\*' 0.05 '.' 0.1 ' ' 1

"k\_\_Bacteria.p\_\_Acidobacteria.c\_\_iii1.8.o\_\_DS.18.f\_\_g\_\_s\_\_"

|              | Df | Sum Sq    | Mean Sq   | F value | Pr(>F)   |
|--------------|----|-----------|-----------|---------|----------|
| Genotype     | 3  | 3.535e-09 | 1.178e-09 | 3.216   | 0.0358 * |
| Sex          | 1  | 1.190e-10 | 1.190e-10 | 0.325   | 0.5727   |
| Genotype:Sex | 3  | 1.194e-09 | 3.980e-10 | 1.086   | 0.3690   |
| Residuals    | 32 | 1.173e-08 | 3.664e-10 |         |          |

---

Signif. codes: 0 '\*\*\*' 0.001 '\*\*' 0.01 '\*' 0.05 '.' 0.1 ' ' 1

"k\_\_Bacteria.p\_\_Acidobacteria.c\_\_Solibacteres.o\_\_Solibacterales.f\_\_g\_\_s\_\_"

|              | Df | Sum Sq    | Mean Sq   | F value | Pr(>F)     |
|--------------|----|-----------|-----------|---------|------------|
| Genotype     | 3  | 4.628e-10 | 1.543e-10 | 5.031   | 0.00572 ** |
| Sex          | 1  | 2.890e-11 | 2.887e-11 | 0.941   | 0.33922    |
| Genotype:Sex | 3  | 1.780e-10 | 5.932e-11 | 1.934   | 0.14389    |
| Residuals    | 32 | 9.814e-10 | 3.067e-11 |         |            |

---

Signif. codes: 0 '\*\*\*' 0.001 '\*\*' 0.01 '\*' 0.05 '.' 0.1 ' ' 1

"k\_\_Bacteria.p\_\_Acidobacteria.c\_\_Sva0725.o\_\_Sva0725.f\_\_g\_\_s\_\_"

|              | Df | Sum Sq    | Mean Sq   | F value | Pr(>F) |
|--------------|----|-----------|-----------|---------|--------|
| Genotype     | 3  | 1.078e-10 | 3.592e-11 | 0.713   | 0.551  |
| Sex          | 1  | 7.000e-12 | 6.990e-12 | 0.139   | 0.712  |
| Genotype:Sex | 3  | 3.058e-10 | 1.019e-10 | 2.024   | 0.130  |
| Residuals    | 32 | 1.611e-09 | 5.035e-11 |         |        |

"k\_\_Bacteria.p\_\_Actinobacteria.c\_\_Acidimicrobiia.o\_\_Acidimicrobiales.f\_\_g\_\_s\_\_"

|              | Df | Sum Sq    | Mean Sq   | F value | Pr(>F)       |
|--------------|----|-----------|-----------|---------|--------------|
| Genotype     | 3  | 5.358e-10 | 1.786e-10 | 5.232   | 0.004721 **  |
| Sex          | 1  | 1.938e-10 | 1.939e-10 | 5.679   | 0.023280 *   |
| Genotype:Sex | 3  | 9.257e-10 | 3.086e-10 | 9.039   | 0.000176 *** |
| Residuals    | 32 | 1.092e-09 | 3.414e-11 |         |              |

---

Signif. codes: 0 '\*\*\*' 0.001 '\*\*' 0.01 '\*' 0.05 '.' 0.1 ' ' 1

"k\_\_Bacteria.p\_\_Actinobacteria.c\_\_Acidimicrobiia.o\_\_Acidimicrobiales.f\_\_EB1017.g\_\_s\_\_"

|          | Df | Sum Sq    | Mean Sq   | F value | Pr(>F) |
|----------|----|-----------|-----------|---------|--------|
| Genotype | 3  | 5.570e-11 | 1.858e-11 | 1.382   | 0.2660 |

|              |    |           |           |       |          |
|--------------|----|-----------|-----------|-------|----------|
| Sex          | 1  | 1.000e-13 | 1.200e-13 | 0.009 | 0.9269   |
| Genotype:Sex | 3  | 1.528e-10 | 5.094e-11 | 3.788 | 0.0197 * |
| Residuals    | 32 | 4.303e-10 | 1.345e-11 |       |          |

---

Signif. codes: 0 '\*\*\*\*' 0.001 '\*\*' 0.01 '\*' 0.05 '.' 0.1 ' ' 1

"k\_\_Bacteria.p\_\_Actinobacteria.c\_\_Acidimicrobiia.o\_\_Acidimicrobiales.f\_\_lamiaceae.g\_\_lamia.s\_\_"

|              | Df | Sum Sq    | Mean Sq   | F value | Pr(>F) |
|--------------|----|-----------|-----------|---------|--------|
| Genotype     | 3  | 1.147e-11 | 3.824e-12 | 0.667   | 0.579  |
| Sex          | 1  | 0.000e+00 | 4.000e-15 | 0.001   | 0.979  |
| Genotype:Sex | 3  | 2.293e-11 | 7.644e-12 | 1.333   | 0.281  |
| Residuals    | 32 | 1.835e-10 | 5.734e-12 |         |        |

"k\_\_Bacteria.p\_\_Actinobacteria.c\_\_Actinobacteria.o\_\_Actinomycetales.f\_\_g\_\_.s\_\_"

|              | Df | Sum Sq    | Mean Sq   | F value | Pr(>F)     |
|--------------|----|-----------|-----------|---------|------------|
| Genotype     | 3  | 1.873e-10 | 6.244e-11 | 4.984   | 0.00598 ** |
| Sex          | 1  | 3.700e-12 | 3.690e-12 | 0.295   | 0.59103    |
| Genotype:Sex | 3  | 3.900e-12 | 1.290e-12 | 0.103   | 0.95779    |
| Residuals    | 32 | 4.008e-10 | 1.253e-11 |         |            |

---

Signif. codes: 0 '\*\*\*\*' 0.001 '\*\*' 0.01 '\*' 0.05 '.' 0.1 ' ' 1

"k\_\_Bacteria.p\_\_Actinobacteria.c\_\_Actinobacteria.o\_\_Actinomycetales.f\_\_Actinomycetaceae.g\_\_Actinomyces.s\_\_"

|              | Df | Sum Sq    | Mean Sq   | F value | Pr(>F) |
|--------------|----|-----------|-----------|---------|--------|
| Genotype     | 3  | 1.580e-11 | 5.258e-12 | 0.506   | 0.681  |
| Sex          | 1  | 1.070e-11 | 1.075e-11 | 1.034   | 0.317  |
| Genotype:Sex | 3  | 5.110e-11 | 1.704e-11 | 1.639   | 0.200  |
| Residuals    | 32 | 3.326e-10 | 1.039e-11 |         |        |

"k\_\_Bacteria.p\_\_Actinobacteria.c\_\_Actinobacteria.o\_\_Actinomycetales.f\_\_Corynebacteriaceae.g\_\_Corynebacterium.s\_\_"

|              | Df | Sum Sq   | Mean Sq   | F value | Pr(>F) |
|--------------|----|----------|-----------|---------|--------|
| Genotype     | 3  | 6.92e-09 | 2.308e-09 | 0.854   | 0.475  |
| Sex          | 1  | 1.83e-09 | 1.825e-09 | 0.675   | 0.417  |
| Genotype:Sex | 3  | 6.41e-09 | 2.137e-09 | 0.790   | 0.508  |
| Residuals    | 32 | 8.65e-08 | 2.703e-09 |         |        |

"k\_\_Bacteria.p\_\_Actinobacteria.c\_\_Actinobacteria.o\_\_Actinomycetales.f\_\_Geodermatophilaceae.g\_\_.s\_\_"

|              | Df | Sum Sq    | Mean Sq   | F value | Pr(>F) |
|--------------|----|-----------|-----------|---------|--------|
| Genotype     | 3  | 2.885e-10 | 9.616e-11 | 1.563   | 0.217  |
| Sex          | 1  | 8.340e-11 | 8.341e-11 | 1.356   | 0.253  |
| Genotype:Sex | 3  | 1.995e-10 | 6.650e-11 | 1.081   | 0.371  |
| Residuals    | 32 | 1.968e-09 | 6.151e-11 |         |        |

"k\_Bacteria.p\_Actinobacteria.c\_Actinobacteria.o\_Actinomycetales.f\_Geodermatophilaceae.g\_M  
odestobacter.s\_\_"

|              | Df | Sum Sq   | Mean Sq   | F value | Pr(>F) |
|--------------|----|----------|-----------|---------|--------|
| Genotype     | 3  | 5.43e-12 | 1.810e-12 | 0.664   | 0.580  |
| Sex          | 1  | 0.00e+00 | 8.000e-16 | 0.000   | 0.986  |
| Genotype:Sex | 3  | 5.47e-12 | 1.824e-12 | 0.669   | 0.577  |
| Residuals    | 32 | 8.72e-11 | 2.725e-12 |         |        |

"k\_Bacteria.p\_Actinobacteria.c\_Actinobacteria.o\_Actinomycetales.f\_Intrasporangiaceae.g\_s\_\_"

|              | Df | Sum Sq    | Mean Sq   | F value | Pr(>F) |
|--------------|----|-----------|-----------|---------|--------|
| Genotype     | 3  | 1.297e-11 | 4.323e-12 | 0.648   | 0.590  |
| Sex          | 1  | 5.870e-12 | 5.873e-12 | 0.881   | 0.355  |
| Genotype:Sex | 3  | 4.140e-11 | 1.380e-11 | 2.069   | 0.124  |
| Residuals    | 32 | 2.134e-10 | 6.669e-12 |         |        |

"k\_Bacteria.p\_Actinobacteria.c\_Actinobacteria.o\_Actinomycetales.f\_Intrasporangiaceae.g\_Terra  
coccus.s\_\_"

|              | Df | Sum Sq    | Mean Sq   | F value | Pr(>F) |
|--------------|----|-----------|-----------|---------|--------|
| Genotype     | 3  | 2.326e-10 | 7.753e-11 | 0.860   | 0.472  |
| Sex          | 1  | 0.000e+00 | 1.000e-14 | 0.000   | 0.992  |
| Genotype:Sex | 3  | 2.363e-10 | 7.875e-11 | 0.874   | 0.465  |
| Residuals    | 32 | 2.883e-09 | 9.011e-11 |         |        |

"k\_Bacteria.p\_Actinobacteria.c\_Actinobacteria.o\_Actinomycetales.f\_Intrasporangiaceae.Other.Ot  
her"

|              | Df | Sum Sq    | Mean Sq   | F value | Pr(>F)     |
|--------------|----|-----------|-----------|---------|------------|
| Genotype     | 3  | 2.508e-11 | 8.361e-12 | 3.208   | 0.03605 *  |
| Sex          | 1  | 1.570e-12 | 1.566e-12 | 0.601   | 0.44394    |
| Genotype:Sex | 3  | 4.547e-11 | 1.516e-11 | 5.816   | 0.00273 ** |
| Residuals    | 32 | 8.339e-11 | 2.606e-12 |         |            |

---

Signif. codes: 0 '\*\*\*' 0.001 '\*\*' 0.01 '\*' 0.05 '.' 0.1 ' ' 1

"k\_Bacteria.p\_Actinobacteria.c\_Actinobacteria.o\_Actinomycetales.f\_Microbacteriaceae.g\_Agrom  
yces.s\_\_"

|              | Df | Sum Sq    | Mean Sq   | F value | Pr(>F)   |
|--------------|----|-----------|-----------|---------|----------|
| Genotype     | 3  | 5.624e-11 | 1.874e-11 | 2.754   | 0.0586 . |
| Sex          | 1  | 5.160e-12 | 5.165e-12 | 0.759   | 0.3902   |
| Genotype:Sex | 3  | 1.493e-11 | 4.975e-12 | 0.731   | 0.5411   |
| Residuals    | 32 | 2.178e-10 | 6.806e-12 |         |          |

---

Signif. codes: 0 '\*\*\*' 0.001 '\*\*' 0.01 '\*' 0.05 '.' 0.1 ' ' 1

"k\_Bacteria.p\_Actinobacteria.c\_Actinobacteria.o\_Actinomycetales.f\_Microbacteriaceae.g\_Cryoc  
ola.s\_\_"

|              | Df | Sum Sq    | Mean Sq   | F value | Pr(>F)  |
|--------------|----|-----------|-----------|---------|---------|
| Genotype     | 3  | 1.083e-10 | 3.610e-11 | 3.264   | 0.034 * |
| Sex          | 1  | 7.000e-13 | 7.300e-13 | 0.066   | 0.799   |
| Genotype:Sex | 3  | 2.200e-12 | 7.300e-13 | 0.066   | 0.978   |
| Residuals    | 32 | 3.539e-10 | 1.106e-11 |         |         |

---

Signif. codes: 0 '\*\*\*' 0.001 '\*\*' 0.01 '\*' 0.05 '.' 0.1 ' ' 1

"k\_Bacteria.p\_Actinobacteria.c\_Actinobacteria.o\_Actinomycetales.f\_Micrococcaceae.g\_.s\_\_"

|              | Df | Sum Sq    | Mean Sq   | F value | Pr(>F) |
|--------------|----|-----------|-----------|---------|--------|
| Genotype     | 3  | 3.454e-09 | 1.151e-09 | 1.568   | 0.216  |
| Sex          | 1  | 6.170e-10 | 6.173e-10 | 0.841   | 0.366  |
| Genotype:Sex | 3  | 2.486e-09 | 8.287e-10 | 1.129   | 0.352  |
| Residuals    | 32 | 2.349e-08 | 7.341e-10 |         |        |

"k\_Bacteria.p\_Actinobacteria.c\_Actinobacteria.o\_Actinomycetales.f\_Micrococcaceae.g\_Microco  
ccus.s\_\_"

|              | Df | Sum Sq    | Mean Sq   | F value | Pr(>F) |
|--------------|----|-----------|-----------|---------|--------|
| Genotype     | 3  | 1.262e-11 | 4.208e-12 | 0.427   | 0.735  |
| Sex          | 1  | 2.600e-13 | 2.630e-13 | 0.027   | 0.871  |
| Genotype:Sex | 3  | 6.056e-11 | 2.019e-11 | 2.049   | 0.127  |
| Residuals    | 32 | 3.153e-10 | 9.854e-12 |         |        |

"k\_Bacteria.p\_Actinobacteria.c\_Actinobacteria.o\_Actinomycetales.f\_Micrococcaceae.g\_Rothia.s  
\_\_aeria"

|              | Df | Sum Sq    | Mean Sq   | F value | Pr(>F) |
|--------------|----|-----------|-----------|---------|--------|
| Genotype     | 3  | 5.920e-12 | 1.973e-12 | 0.398   | 0.755  |
| Sex          | 1  | 1.600e-13 | 1.600e-13 | 0.032   | 0.859  |
| Genotype:Sex | 3  | 1.966e-11 | 6.552e-12 | 1.323   | 0.284  |
| Residuals    | 32 | 1.585e-10 | 4.954e-12 |         |        |

"k\_Bacteria.p\_Actinobacteria.c\_Actinobacteria.o\_Actinomycetales.f\_Micrococcaceae.g\_Rothia.s  
\_\_dentocariosa"

|              | Df | Sum Sq    | Mean Sq   | F value | Pr(>F) |
|--------------|----|-----------|-----------|---------|--------|
| Genotype     | 3  | 2.730e-11 | 9.102e-12 | 1.201   | 0.325  |
| Sex          | 1  | 4.000e-14 | 4.100e-14 | 0.005   | 0.942  |
| Genotype:Sex | 3  | 5.990e-12 | 1.998e-12 | 0.264   | 0.851  |
| Residuals    | 32 | 2.425e-10 | 7.578e-12 |         |        |

"k\_Bacteria.p\_Actinobacteria.c\_Actinobacteria.o\_Actinomycetales.f\_Micrococcaceae.Other.Other  
"

|  | Df | Sum Sq | Mean Sq | F value | Pr(>F) |
|--|----|--------|---------|---------|--------|
|--|----|--------|---------|---------|--------|

|              |    |           |           |       |         |    |
|--------------|----|-----------|-----------|-------|---------|----|
| Genotype     | 3  | 1.075e-09 | 3.584e-10 | 6.356 | 0.00167 | ** |
| Sex          | 1  | 1.000e-13 | 1.000e-13 | 0.001 | 0.97571 |    |
| Genotype:Sex | 3  | 1.196e-10 | 3.990e-11 | 0.707 | 0.55510 |    |
| Residuals    | 32 | 1.805e-09 | 5.640e-11 |       |         |    |

---

Signif. codes: 0 '\*\*\*\*' 0.001 '\*\*\*' 0.01 '\*\*' 0.05 '.' 0.1 ' ' 1

"k\_Bacteria.p\_Actinobacteria.c\_Actinobacteria.o\_Actinomycetales.f\_Mycobacteriaceae.g\_Mycobacterium.s\_\_"

|              | Df | Sum Sq    | Mean Sq   | F value | Pr(>F) |
|--------------|----|-----------|-----------|---------|--------|
| Genotype     | 3  | 1.997e-11 | 6.656e-12 | 0.694   | 0.563  |
| Sex          | 1  | 7.800e-13 | 7.810e-13 | 0.081   | 0.777  |
| Genotype:Sex | 3  | 3.759e-11 | 1.253e-11 | 1.306   | 0.289  |
| Residuals    | 32 | 3.070e-10 | 9.593e-12 |         |        |

"k\_Bacteria.p\_Actinobacteria.c\_Actinobacteria.o\_Actinomycetales.f\_Nocardiaceae.g\_Rhodococcus.s\_\_"

|              | Df | Sum Sq    | Mean Sq   | F value | Pr(>F) |
|--------------|----|-----------|-----------|---------|--------|
| Genotype     | 3  | 4.548e-09 | 1.516e-09 | 2.180   | 0.110  |
| Sex          | 1  | 9.500e-11 | 9.490e-11 | 0.136   | 0.714  |
| Genotype:Sex | 3  | 9.460e-10 | 3.153e-10 | 0.453   | 0.717  |
| Residuals    | 32 | 2.226e-08 | 6.955e-10 |         |        |

"k\_Bacteria.p\_Actinobacteria.c\_Actinobacteria.o\_Actinomycetales.f\_Nocardioidaceae.g\_\_s\_\_"

|              | Df | Sum Sq    | Mean Sq   | F value | Pr(>F)   |
|--------------|----|-----------|-----------|---------|----------|
| Genotype     | 3  | 5.710e-10 | 1.903e-10 | 3.090   | 0.0409 * |
| Sex          | 1  | 4.500e-11 | 4.504e-11 | 0.731   | 0.3988   |
| Genotype:Sex | 3  | 1.434e-10 | 4.780e-11 | 0.776   | 0.5160   |
| Residuals    | 32 | 1.971e-09 | 6.159e-11 |         |          |

---

Signif. codes: 0 '\*\*\*\*' 0.001 '\*\*\*' 0.01 '\*\*' 0.05 '.' 0.1 ' ' 1

"k\_Bacteria.p\_Actinobacteria.c\_Actinobacteria.o\_Actinomycetales.f\_Nocardioidaceae.g\_Nocardioides.s\_\_"

|              | Df | Sum Sq    | Mean Sq   | F value | Pr(>F) |
|--------------|----|-----------|-----------|---------|--------|
| Genotype     | 3  | 1.253e-10 | 4.177e-11 | 1.006   | 0.403  |
| Sex          | 1  | 4.550e-11 | 4.547e-11 | 1.095   | 0.303  |
| Genotype:Sex | 3  | 1.201e-10 | 4.005e-11 | 0.964   | 0.421  |
| Residuals    | 32 | 1.329e-09 | 4.153e-11 |         |        |

"k\_Bacteria.p\_Actinobacteria.c\_Actinobacteria.o\_Actinomycetales.f\_Propionibacteriaceae.g\_Pro-pionibacterium.s\_\_acnes"

|          | Df | Sum Sq    | Mean Sq   | F value | Pr(>F) |
|----------|----|-----------|-----------|---------|--------|
| Genotype | 3  | 4.270e-11 | 1.423e-11 | 1.838   | 0.160  |
| Sex      | 1  | 2.122e-11 | 2.122e-11 | 2.741   | 0.108  |

Genotype:Sex 3 2.730e-11 9.101e-12 1.176 0.334  
 Residuals 32 2.477e-10 7.742e-12

"k\_\_Bacteria.p\_\_Actinobacteria.c\_\_Actinobacteria.o\_\_Actinomycetales.f\_\_Pseudonocardiaceae.g\_\_Am  
 ycolatopsis.s\_\_"

|              | Df | Sum Sq    | Mean Sq   | F value | Pr(>F) |
|--------------|----|-----------|-----------|---------|--------|
| Genotype     | 3  | 1.405e-10 | 4.682e-11 | 1.803   | 0.1664 |
| Sex          | 1  | 2.160e-11 | 2.159e-11 | 0.831   | 0.3687 |
| Genotype:Sex | 3  | 2.161e-10 | 7.205e-11 | 2.775   | 0.0573 |
| Residuals    | 32 | 8.308e-10 | 2.596e-11 |         |        |

---

Signif. codes: 0 '\*\*\*' 0.001 '\*\*' 0.01 '\*' 0.05 '.' 0.1 ' ' 1

"k\_\_Bacteria.p\_\_Actinobacteria.c\_\_Actinobacteria.o\_\_Actinomycetales.f\_\_Streptomycetaceae.g\_\_Strep  
 tomyces.s\_\_"

|              | Df | Sum Sq    | Mean Sq   | F value | Pr(>F) |
|--------------|----|-----------|-----------|---------|--------|
| Genotype     | 3  | 3.000e-13 | 1.070e-13 | 0.010   | 0.999  |
| Sex          | 1  | 9.200e-12 | 9.220e-12 | 0.867   | 0.359  |
| Genotype:Sex | 3  | 4.070e-11 | 1.356e-11 | 1.275   | 0.299  |
| Residuals    | 32 | 3.403e-10 | 1.063e-11 |         |        |

"k\_\_Bacteria.p\_\_Actinobacteria.c\_\_Actinobacteria.o\_\_Bifidobacteriales.f\_\_Bifidobacteriaceae.g\_\_Bifido  
 bacterium.Other"

|              | Df | Sum Sq    | Mean Sq   | F value | Pr(>F)   |
|--------------|----|-----------|-----------|---------|----------|
| Genotype     | 3  | 3.799e-05 | 1.266e-05 | 3.205   | 0.0362 * |
| Sex          | 1  | 2.562e-05 | 2.562e-05 | 6.483   | 0.0159 * |
| Genotype:Sex | 3  | 3.534e-05 | 1.178e-05 | 2.981   | 0.0459 * |
| Residuals    | 32 | 1.265e-04 | 3.952e-06 |         |          |

---

Signif. codes: 0 '\*\*\*' 0.001 '\*\*' 0.01 '\*' 0.05 '.' 0.1 ' ' 1
